# Supplementary material for: A simple constrained machine learning model for predicting high-pressure-hydrogen-compressor materials
Source: Royal Society of Chemistry journal article supplement (doi:10.1039/c8me00005k), 2018-01-01
Supplement: c8me00005k1.xlsx [file c8me00005k1.xlsx]

## Sheet: Histogram
Material Class	Count of Material Class
A2B	44
AB	59
AB2	167
AB5	144
MIC	76
SS	55

## Sheet: Hydride materials
Material Class	Composition Formula	Hydrogen Weight Percent	Heat of Formation (kJ/mol H2)	Temperature (˚C)	Pressure (Atmospheres Absolute)	Author Year	Reference Number	Comment1	Comment2	Comment3
A2B	Th1.5Ce.5Al	0.4	133	650	0.0003	Van Vucht, 1963	492
A2B	Th2Al	0.8	130	500	0.001	Van Vucht, 1963	492
A2B	Ti2Cu	2.2	130	500	0.12	Kadel, 1978	523
A2B	Ti2Pd	1.4	90			Kadel, 1978	523
A2B	Zr2Cu	1.3	144	600	0.003	Pebler, 1966	12
A2B	Zr2Cu	1.3	142	700	0.02	Kadel, 1979	429
A2B	Zr2Ni	1.3	183	604	0.003	Pebler, 1966	12
A2B	Hf2Fe	1.1	70	277	0.38	Aubertin, 1989	425
A2B	Mg1.5Ni	2.6	29.1	300	3.7	Kuji, 2002	1492		Ball milled
A2B	Mg1.75Ni	2.8	26.6	300	4.5	Kuji, 2002	1492		Ball milled
A2B	Mg1.92Al.08Ni	3.5	70.5	295	4	Hirata, 1983	427
A2B	Mg1.9Ti.1Ni	2.9	62.5	300	2.5	Liang, 1999	1226	Nanocrystalline
A2B	Mg2Co	4.5	76	450	16	Reiser, 2000	1463	Mg2Co not stable without H
A2B	Mg2Co	4.2	108	418	5.7	Yoshida, 1993	594	(Mg2Co phase not stable without H)
A2B	Mg2Cu	2.6	72.9	295	6	Reilly, 1967	87
A2B	Mg2Fe	5.5	77.2	450	25	Reiser, 2000	1463	Mg2Fe not stable without H
A2B	Mg2Ni	3.1	31.3	300	3.7	Kuji, 2002	1492		Ball milled
A2B	Mg2Ni	3.2	61	250	1.1	Yang, 2002	1493		Ball milling + diffusion synthesis
A2B	Mg2Ni	3.3	67	300	2.2	Liang, 1999	1226	Nanocrystalline
A2B	Mg2Ni	3.3	65.9	300	3.2	Sun, 1999	1228	Solid-state synthesized
A2B	Mg2Ni	3.3	63.2	300	3.1	Song, 1998	1224
A2B	Mg2Ni	3.5	64.4	180	0.09	Guthrie, 1998	863	Vapor synthesized	Non-twinned
A2B	Mg2Ni	3.5	64.4	180	0.07	Guthrie, 1998	863	Vapor synthesized	Twinned
A2B	Mg2Ni	3.5	68.6	180	0.05	Guthrie, 1998	863	Melted	Twinned
A2B	Mg2Ni	3.6	64.5	299	3.2	Reilly, 1968	88
A2B	Mg2Ni	3.6	64.6	300	2.5	Lutz, 1977	420
A2B	Mg2Ni	3.6	68.8	180	0.06	Guthrie, 1998	863	Melted	Non-twinned
A2B	Mg2Ni	3.6	71.3	300	2.6	Li, 2000	1236	Hydriding combustion synthesis
A2B	Mg2Ni	3.7	62.2	450	57	Reiser, 2000	1463
A2B	Mg2Ni.75Co.25	3.1	64.5	279	1	Darnaudery, 1983	418
A2B	Mg2Ni.75Cr.25	3	59.9	248	1	Darnaudery, 1983	418
A2B	Mg2Ni.75Cu.25		53.2	227	1	Darnaudery, 1983	418
A2B	Mg2Ni.75Fe.25	2.8	63.2	253	1	Darnaudery, 1983	418
A2B	Mg2Ni.75Fe.25	3.3	65.2	300	1.9	Yuan, 1997	828		Includes free Mg
A2B	Mg2Ni.75V.25	2.9	62.4	250	1	Darnaudery, 1983	418
A2B	Mg2Ni.75Zn.25	3.3	61.5	246	1	Darnaudery, 1983	418
A2B	Mg2Ni0.75Co0.25	3.2	61	250	0.5	Yang, 2002	1493		Ball milling + diffusion synthesis
A2B	Mg2Ni0.75Cr0.25	3.2	61	250	0.9	Yang, 2002	1493		Ball milling + diffusion synthesis
A2B	Mg2Ni0.75Cu0.25	3.2	59	250	1.2	Yang, 2002	1493		Ball milling + diffusion synthesis
A2B	Mg2Ni0.75Fe0.25	3.2	60	250	1	Yang, 2002	1493		Ball milling + diffusion synthesis
A2B	Mg2Ni0.75Mn0.25	3.2	58	250	1	Yang, 2002	1493		Ball milling + diffusion synthesis
A2B	Mg2Ni0.75Ti0.25	3.2	56	250	1.2	Yang, 2002	1493		Ball milling + diffusion synthesis
A2B	Mg2Ni0.75Ti0.25	3.2	59	250	1.3	Yang, 2002	1493		Ball milling + diffusion synthesis
A2B	Mg2Ni0.7Zr0.3	3.5	59.8	340	10	Zhang, 1998	1465
AB	ThCo	1.4	46.8	40	0.05	Buschow, 1975	187
AB	ThNi	1.2	45.3	40	0.01	Buschow, 1975	187
AB	Ti.46Fe.45V.05Mn.05	1.7	28.6	22	2	Mitrokhin, 1993	396
AB	Ti.96Zr.04Fe.95Nb.04	1.7	31.8	30	1.4	Sasai, 1983	79
AB	Ti.9Fe.9B.2	1.5	7.6	27	14	Rajalakshmi, 1998	852
AB	Ti.9La.1Co	1.5	60	150	3.2	Kato, 1981	83
AB	Ti.9Zr.1Fe	1	28.9	30	3.3	Jang, 1986	397
AB	TiCo	1.1	61.1	150	2.2	Someno, 1979	381
AB	TiCo	1.3	57.8	150	2.2	Osumi, 1980	80
AB	TiCo	1.4	57.4	155	4	Yamanaka, 1975	73
AB	TiCo	1.45	54	152	2	Burch, 1979	500
AB	TiCo.5Fe.5	1.1	42.3	100	4	Suzuki, 1981	82
AB	TiCo.5Mn.5	1.6	46.9	120	3.2	Osumi, 1980	80
AB	TiCu	1.7	75	200	0.004	Maeland, 1978	389
AB	TiCu	1.6	126	500	0.15	Kadel, 1978	523
AB	TiFe	1.7	26.7	51	11	Yamanaka, 1975	73
AB	TiFe	1.9	28.1	30	5.2	Reilly, 1974	319
AB	TiFe.5Co.5	1.1	41.4	150	12	Someno, 1979	381
AB	TiFe.6Ni.4	1.5	48.6	50	0.035	Bershadsky, 1993	395
AB	TiFe.7Mn.2	2	34.7	40	1.4	Reilly, 1976	383
AB	TiFe.8Be.2	1.4	30.5	21	0.7	Bruzzone, 1980	421
AB	TiFe.8Ni.15V.05	1.3	41	150	7	Oguro, 1983	78
AB	TiFe.8Ni.2	1	41.9	50	0.28	Mintz, 1981	390
AB	TiFe.8Ni.2	1.3	41.2	50	0.33	Huston, 1980	77
AB	TiFe.95Mn.05	1.6	29.3	50	9	Mintz, 1981	390
AB	TiFe.9Al.1	1.3	30	25	1.2	Bruzzone, 1981	422
AB	TiFe.9Co.1	1.5	30.6	50	5	Lee, 1999	1211
AB	TiFe.9Cr.1	1.1	30.5	150	20	Someno, 1979	381
AB	TiFe.9Mn.1	1.2	27.2	100	30	Someno, 1979	381
AB	TiFe.9Mn.1	1.9	29.5	25	2.6	Johnson, 1978	330
AB	TiFe.9Ni.1	1.4	35.6	50	1.8	Lee, 1999	1211
AB	ErAg	0.3	35.2	790	0.01	Philipp, 1991	384
AB	ErNi	1.4	105			Ensslen, 1983	385
AB	HfCo	1.3	43	270	1	Nemirovskaya, 1991	606
AB	HfCo	1.3	59	50	0.001	van Essen, 1979	386
AB	HfNi	1.3	40	190	1	Nemirovskaya, 1991	606
AB	HfNi	1.3	50	50	0.02	van Essen, 1979	386
AB	LaNi	1.3	118			Maeland, 1976	387
AB	LaNi	1.9	100			Busch, 1978	189
AB	LaNi	2	126			Ensslen, 1983	385
AB	Li.94Pd	0.9	69.2	300	0.02	Sakamoto, 1995	411
AB	LiPd	0.7	75.3			Nacken, 1977	388
AB	LiPt	0.6	134			Nacken, 1977	388
AB	LuNi	1.2	100			Ensslen, 1983	385
AB	TiNi	1.4	58			Burch, 1979	500
AB	UCo	0.6	55	150	0.08	Yamamoto, 1991	398
AB	YbNi	1.2	147			Ensslen, 1983	385
AB	YbPd	1	67			Ensslen, 1983	385
AB	Zr.5Hf.5Co	1.1	76.2	200	0.2	Konishi, 1995	858
AB	Zr.7Hf.3Co	1.4	80.3	200	0.03	Konishi, 1995	858
AB	ZrCo	1.2	90	252	0.05	Devillers, 1989	399
AB	ZrCo	1.7	76.3	200	0.005	Konishi, 1995	858
AB	ZrCo	2	66	430	1	Nemirovskaya, 1991	606
AB	ZrCo	1.6	67	200	0.013	Irvine, 1978	70
AB	ZrCo.84Ni.16	1.6	83	250	0.01	Irvine, 1980	400
AB	ZrNi	1.2	47.5	300	0.005	Luo, 1990	550
AB	ZrNi	1.7	40.1	250	0.2	Cantrell, 1995	409
AB	ZrNi	1.8	76.8	250	0.26	Libowitz, 1958	68
AB	ZrNi	2	64	300	1	Nemirovskaya, 1991	606
AB2	CaNi2	2.1	85	25	0.05	Oesterreicher, 1980	43
AB2	CeMg2	3.1	101	216	0.1	Verbetsky, 1989	1155
AB2	DyFe2	1.5	58	80	0.0001	Kierstead, 1980	356
AB2	ScMn2	2.3	63			Shilov, 1983	531
AB2	Th1.5Ce.5Al	0.4	133	650	0.0003	Van Vucht, 1963	492
AB2	ThNi2	1.1	44.7			Buschow, 1975	187
AB2	ThZr2	0.5	413	910	0.08	Bartscher, 1988	556
AB2	Ti.5Zr.5Mn1.2Fe.3	1.9	39	120	1.5	Komazaki, 1983	29
AB2	Ti.5Zr.5Mn2	1.8	40	70	1.5	Gamo, 1979	34
AB2	Ti.5Zr.5V.5Ni1.3Zr.2	1.6	38.8			Verbetsky, 1999	1282			No plateau
AB2	Ti.6Zr.4Mn1.4Cr.4Cu.2	1.8	48	20	0.3	Gamo, 1979	35
AB2	Ti.6Zr.4Mn1.9Cu.1	1.7	40.6	20	0.5	Gamo, 1979	34
AB2	Ti.7Zr.3Mn1.9Mo.1	1.7	41	17	0.9	Gamo, 1979	34
AB2	Ti.8Zr.2Cr1.8		23	0	3	Andreev, 1984	684
AB2	Ti.8Zr.2CrMn		30	0	2	Andreev, 1984	684
AB2	Ti.8Zr.2Mn.8Cr1.0Fe.2	1.8	28	20	12	Gamo, 1979	35
AB2	Ti.8Zr.2Mn1.2Cr.8	2	28.9	20	5	Machida, 1978	371
AB2	Ti.8Zr.2Mn1.2V.2Cr.6	1.9	30.5	20	2.2	Gamo, 1979	35
AB2	Ti.8Zr.2Mn1.4V.2Cr.4	1.9	29	20	9	Gamo, 1980	31
AB2	Ti.8Zr.2Mn1.5Cr.5	2	27.5	30	10	Hong, 1993	373
AB2	Ti.8Zr.2Mn1.5Cu.5	1.6	27	30	3	Hong, 1993	373
AB2	Ti.8Zr.2Mn1.5Fe.5	1.7	25.4	30	11	Hong, 1993	373
AB2	Ti.8Zr.2Mn1.5V.5	2	45.6	30	0.5	Hong, 1993	373
AB2	Ti.8Zr.2Mn1.6V.2Cr.2	1.9	30.5	20	2	Gamo, 1979	35
AB2	Ti.8Zr.2Mn1.7V.2Mo.1	2	35	14	1	Gamo, 1979	35
AB2	Ti.8Zr.2Mn1.8Mo.2	1.7	29	20	4	Gamo, 1980	31
AB2	Ti.8Zr.2V.6Mn.2Pd.1Ni.8Fe.2	1.3	46.5	25	0.01	Yang, 1999	1180
AB2	Ti.95Zr.05Cr1.2Mn.8	1.7	21.9	20	5.5	Hagstrom, 1998	1242
AB2	TiV1.4Ni.6	2.9	28.8	60	0.4	Chen, 1994	1163
AB2	TiV1.6Ni.4	3.3	33.2	120	1	Chen, 1994	1163
AB2	TiV1.8Ni.2	3.6	35.3	90	0.08	Chen, 1994	1163
AB2	TmFe2	1.6	56.8	80	0.003	Kierstead, 1982	374
AB2	UNiAl	0.5	74.6	100	0.0003	Yamanaka, 1999	1260
AB2	YCo2	2	31			van Mal, 1976	360
AB2	YNi2	1.7	44			van Mal, 1976	360
AB2	Zr(Fe.75Cr.25)2	1.4	25.6	45	3	Fang, 2000	1283
AB2	Zr(Ni.6V.2Mn.2)2.4	1.6	39.9	30	0.3	Gao, 1995	404
AB2	Zr.2Ho.8CoFe	3.3		27	9	Kesavan, 1998	826
AB2	Zr.2Ho.8Fe.5Co1.5	1.3		27	4	Kesavan, 2000	1286			Sloping plateau
AB2	Zr.5Ti.5CrFe	1.8	27	23	4	Yu, 1985	555
AB2	Zr.6Ho.4Co2	1	29.3	50	2	Ramesh, 1993	363
AB2	Zr.76Ti.24Ni1.16Mn.63V.14Fe.18	1.6	29.7	30	5	Morii, 1995	410
AB2	ZrCr2Fe.8	1.2	46.5	100	0.8	Drasner, 1991	564
AB2	ZrCr2Ni.8	1.4	37.9	100	1	Drasner, 1991	564
AB2	ZrCrFe	1.6	36	51	2	Yu, 1985	555
AB2	ZrCrFe1.2	1.4	34	120	7	Ivanova, 1999	1259			calor.
AB2	ZrCrFe1.6	1.2	29.1	30	2.5	Uchida, 1986	370
AB2	ZrCrFe1.8	1.3	19	23	6	Wallace, 1985	1168			sloping plateau
AB2	ZrCrFeCo.8	1.1	20	0	10	Wallace, 1985	1168			sloping plateau
AB2	ZrCrFeCu.8	1.2	28	23	3	Wallace, 1985	1168
AB2	ZrCrFeMn.8	1.4	32	23	0.6	Wallace, 1985	1168			sloping plateau
AB2	ZrCrFeNi.8	1.1	21	0	8	Wallace, 1985	1168			sloping plateau
AB2	ZrFe1.4Cr	1.7	21	23	1	Sinha, 1985	554
AB2	ZrFe1.4Cr.6	1.5	29.9	20	3	Ivey, 1984	29
AB2	ZrFe1.5Cr	1.5	23	23	1.5	Sinha, 1985	554
AB2	ZrFe1.5Cr.5	1.4	24.3	50	5.5	Shaltiel, 1977	14
AB2	ZrFe1.5Cr.5	1.5	25.6	20	5	Ivey, 1984	29
AB2	ZrFe1.5V.5	1.6	32.2	50	0.25	Shaltiel, 1977	14
AB2	ZrFe1.6Al.4	1	36	24	10	Fujii, 1982	22
AB2	ZrFeCr	1.7	49.4	50	0.1	Shaltiel, 1977	14
AB2	ZrFeMn	1.6	31	150	10	Suzuki, 1982	27
AB2	ZrFeMo	1.2	29.8	30	0.6	Semenenko, 1980	638
AB2	ZrFeV	1.6	48.1	50	0.0012	Shaltiel, 1977	14
AB2	ZrMn1.11Fe1.22	1.3	29.4	30	2	Uchida, 1986	370
AB2	ZrMn1.11Fe1.22	1.5	13.3	100	5	Sinha, 1983	23
AB2	ZrMn1.22Fe1.11	1.5	13	23	1	Sinha, 1983	23
AB2	ZrMn1.22Fe1.14	1.2	31	40	2	Uchida, 1986	370
AB2	ZrMn1.2Fe0.4	1.5	33	50	0.4	Shaltiel, 1977	14	(+ ZrMnFe)
AB2	ZrMn1.53Fe1.27	1	9	23	4	Sinha, 1983	23
AB2	ZrMn1.8	1.6	38.8	50	0.1	Luo, 1992	582
AB2	ZrMn2		38			Pedziwiatr, 1983	28
AB2	ZrMn2	1.5	36	210	3	Fujii, 1987	369
AB2	ZrMn2	1.7	37.4	50	0.01	Luo, 1992	582
AB2	ZrMn2	1.8	53.2	80	0.03	Shaltiel, 1977	14
AB2	ZrMn2.5	1.4	32	50	0.07	Luo, 1992	582
AB2	ZrMn2.6Fe.2	1.4	15	100	0.12	Pourarian, 1982	512
AB2	ZrMn2.7	1.3	33.6	100	3	Uchida, 1986	370
AB2	ZrMn2.8		29.9	23	0.3	Pedziwiatr, 1983	28
AB2	ZrMn2.8	1.5	18.4	23	0.4	Pourarian, 1981	19
AB2	ZrMn2.8Fe.4	1.2	23	100	0.12	Pourarian, 1982	512
AB2	ZrMn2Co.8		20.9	23	4	Pedziwiatr, 1983	28
AB2	ZrMn2Co.8	0.9	19.3	23	3.5	Pourarian, 1984	551
AB2	ZrMn2Cu.8		31.6	23	0.06	Pedziwiatr, 1983	28
AB2	ZrMn2Cu.8	1.4	27	50	0.06	Pourarian, 1984	551
AB2	ZrMn2Fe.8		25	23	0.5	Pedziwiatr, 1983	28
AB2	ZrMn2Fe.8	1.2	29.3	30	2	Uchida, 1986	370
AB2	ZrMn2Fe.8	1.4	12.7	23	0.7	Sinha, 1982	509
AB2	ZrMn2Fe1.2	0.7	6.8	25	3	Sinha, 1982	509
AB2	ZrMn2Ni.8		25	23	1.6	Pedziwiatr, 1983	28
AB2	ZrMn2Ni.8	1.3	18.6	23	3	Pourarian, 1984	551
AB2	ZrMn2-yCoy	1.5	40	50	0.08 - 1	Shaltiel, 1977	14	(y = 0.5-1.0)
AB2	ZrMn3	1.3	29.2	50	0.6	Luo, 1992	582
AB2	ZrMn3.8	1.2	17	30	0.7	Pourarian, 1981	19
AB2	ZrMnFe	0.1	20.4			Fukada, 1999	1255		0.4 atm at 0°C	No plateau
AB2	ZrMnFe.7Co.3	1.2	17.6	30	4	Prakash, 2000	1285			Sloping plateau
AB2	ZrMo2	0.3	38.5			Pebler, 1967	13
AB2	ErFe2	1.1	56.2	130	0.013	Flanagan, 1987	358
AB2	ErFe2	1.5	57.9	80	0.001	Kierstead, 1980	356
AB2	GdCo2	1.4	54			Buschow, 1977	54
AB2	GdCo2	1.5	31			van Mal, 1976	360
AB2	GdCo2	1.5	48	200	2	Shaltiel, 1979	361
AB2	GdFe2	1.5	29	292	1	Shaltiel, 1979	361
AB2	GdMn2	1.1	87.5	360	1	Shaltiel, 1979	361
AB2	GdNi2	1.5	90	300	1	Shaltiel, 1979	361
AB2	GdRh2	0.9	49	142	6	Shaltiel, 1979	361
AB2	GdRu2	1	60	225	3	Shaltiel, 1979	361
AB2	Ho.6Zr.4Co2		30	27	0.06	Ramesh, 1991	682
AB2	Ho.6Zr.4Co2	1	33	50	0.2	Ramesh, 1993	363
AB2	Ho.6Zr.4Fe2		18			Kesavan, 1995	680
AB2	Ho.8Zr.2Co2		13	27	0.06	Ramesh, 1991	682
AB2	Ho.8Zr.2Co2	1.2	25	50	0.2	Ramesh, 1993	363
AB2	Ho.8Zr.2Fe2		24			Kesavan, 1996	681
AB2	LaNi2	1.9	79.5			Maeland, 1976	387
AB2	LaRh2	1.4	44.3	244	2	Shaltiel, 1979	361
AB2	LiPd2	0.8	51	300	0.16	Sakamoto, 1995	411
AB2	MgYNi4	1.05	35.8	40	4	Aono, 2000	1273
AB2	PrCo2	1.5	67	100	0.001	Clinton, 1975	102
AB2	Ti.98Zr.02Mn1.5V.43Fe.09Cr.05	1.9	27.4	20	9	Bernauer, 1989	341
AB2	Ti.98Zr.02V.43Fe.09Cr.05Mn1.5	1.6	23.3	20	20	Hahne, 1998	850
AB2	Ti.9Zr.15Mn1.6Cr.2V.2	2.1	15.4	25	7	Xu, 2001	1290
AB2	Ti.9Zr.2Mn1.4Cr.4(VFe).2	2.1	25.5	25	3	Xu, 2001	1290	VFe=ferrovanadium
AB2	Ti.9Zr.2Mn1.4Cr.4V.2	2.1	26.7	25	1.9	Xu, 2001	1290
AB2	Ti.9Zr.2Mn1.6Cr.2(VFe).2	2.1	30	25	7	Xu, 2001	1290	VFe=ferrovanadium
AB2	Ti.9Zr.2Mn1.6Ni.2(VFe).2	2	23.2	25	3.6	Xu, 2001	1290	VFe=ferrovanadium
AB2	Ti.9Zr.2Mn1.6Ni.2V.2	2.1	31.7	25	2.7	Xu, 2001	1290
AB2	Ti.9Zr.2Mn1.8(VFe).2	2	29.1	25	3	Xu, 2001	1290	VFe=ferrovanadium
AB2	Ti.9Zr.2Mn1.8V.2	2.1	26	25	3	Xu, 2001	1290
AB2	Ti.9Zr.3Mn1.3Cu.05Mo.05V.2Cr.2	2	15.2	20	0.06	Au, 1995	860
AB2	Ti0.9Zr.1MnCr.9V.1	1.7	22.5	30	24	Liu, 1996	690
AB2	Ti1.2Cr1.9Mn.1	1.8	20.1	-10	19.4	Osumi, 1983	40
AB2	Ti1.2CrMn	2	25.5	-10	5.7	Osumi, 1983	40
AB2	TiCr1.8		19	0	70	Andreev, 1984	684
AB2	TiCr1.8	1.9	19.7	-32	20	Beeri, 1999	1258
AB2	TiCr1.8	2.43	20.2	-20	40	Johnson, 1978	335
AB2	TiCr2	0.8	23	20	40	Machida, 1978	371
AB2	TiCr2	1.8	29.7	-40	2	Kabutomori, 1995	479
AB2	TiCrMn		24	0	18	Andreev, 1984	684
AB2	TiCrMn	2.1	19.6	40	190	Beeri, 2000	1269		at T=-60C
AB2	TiCrMn.85Fe.3V.15	1.6	20.9	20	6	Hagstrom, 1998	1242
AB2	TiMn1.3Fe.11	1.7	32.7	24	6	Gamo, 1980	36
AB2	TiMn1.4Ni.1		28	0	2	Andreev, 1984	684
AB2	TiMn1.5		27	0	5	Andreev, 1984	684
AB2	TiMn1.5	1.9	28.7	20	7	Gamo, 1981	31
AB2	TiMn1.5	1.9	27.9	0	1.8	Andreev, 1982	522
AB2	TiMn2	1.7	24.6	0	20	Klyamkin, 1994	688
AB2	Zr.79Ti.21MnFe1.02	1.5	33	30	1.5	Uchida, 1986	370
AB2	Zr.7Ti.3Cr.6Fe1.4	1.5	22	23	7	Wallace, 1985	1169
AB2	Zr.7Ti.3CrFe	1.7	30	23	0.8	Yu, 1985	555
AB2	Zr.7Ti.3Mn2Fe.8	0.8	14	25	2.6	Sinha, 1982	20
AB2	Zr.7Ti.3MnFe	1.7	10	23	2	Sinha, 1982	25
AB2	Zr.8Ti.2Cr.6Fe1.4	1.6	27	23	3	Wallace, 1985	1169
AB2	Zr.8Ti.2FeMn	1.4	30	30	1.6	Park, 1991	562
AB2	Zr.8Ti.2MnFe	1.7	11	23	1	Sinha, 1982	25
AB2	Zr.9Ti.1Cr.55Fe1.45	1.6	1.03	10	2	Park, 2001	1292
AB2	Zr.9Ti.1Cr1-yFe1+y	1.4	28	30	0.2 - 4	Lee, 1990	378	(y = 0-0.4)
AB2	ZrCo1.5V.5	1.5	34.3	50	1.5	Shaltiel, 1977	14
AB2	ZrCoCr	1.6	40.2	50	0.7	Shaltiel, 1977	14
AB2	ZrCoV	1.8	49.4	50	0.0023	Shaltiel, 1977	14
AB2	ZrCr.6Fe1.4	1.5	27	23	0.8	Wallace, 1985	1169
AB2	ZrCr1.2Fe.8	1.4	50.2	70	0.75	Boulghallat, 1993	375	(+ Fe1.2 & Fe1.5)
AB2	ZrCr1.2Ni.8	2	56.4	70	0.25	Boulghallat, 1993	375
AB2	ZrCr2		36			Pedziwiatr, 1983	28
AB2	ZrCr2	1.8	42	27	0.003	Pebler, 1967	13
AB2	ZrCr2Co.8	1	45.3	100	2	Drasner, 1991	564
AB2	ZrMo2	1	22	-78	0.4	Semenko, 1996	1154
AB2	ZrMoCr	1.3	27.6	25	0.2	Mitrokhin, 1981	1148			sloping plateau
AB2	ZrV2	2.4	155			Pebler, 1967	13
AB5	CaNi4B	1.2	55.7	27	0.01	Oesterreicher, 1980	43
AB5	CaNi5		42	22	0.08	Yagisawa, 1984	671	Lowest plateau only
AB5	CaNi5	0.3	62	22	0.04	Yagisawa, 1984	671	Lowest plateau only
AB5	CaNi5	1.2	33.9	25	0.7	Nahm, 1990	252
AB5	CaNi5	1.7	37.7	25	0.5	Oesterreicher, 1980	43
AB5	CaNi5	1.9	31.9	25	0.5	Sandrock, 1977	106
AB5	CaNi5	1.9	32.2	20	0.33	Yoshikawa, 1982	138
AB5	Ce.5La.5Ni2.5Cu2.5	1.1	22.9	23	2.2	Pourarian, 1986	254
AB5	Ce.6La.4Ni5	1.5	22.3	25	28	Dayan, 1981	382
AB5	Ce.8La.2Ni4.7Cu0.3	1.5	21	23	18	Klyamkin, 1995	407
AB5	Ce.8La.2Ni5	1.5	23.8	23	30	Klyamkin, 1995	407
AB5	Ce0.2Pr0.8Co5	0.6	39	20	0.23	Burnasheva, 1978	1517			Lower plateau
AB5	Ce0.4Pr0.6Co5	0.6	38.5	20	1	Burnasheva, 1978	1517			Lower plateau
AB5	Ce0.6Pr0.4Co5	0.6	38.5	20	1.26	Burnasheva, 1978	1517			Lower plateau
AB5	Ce0.7La0.7Ni5	1.4	25	20	11	Mordkovich, 1993	1525
AB5	Ce0.8La0.2Ni5	1.5	20.8	60	74	Salamova, 2002	1509
AB5	Ce0.8Pr0.2Co5	0.6	37	20	1.42	Burnasheva, 1978	1517			Lower plateau
AB5	CeCo5	0.5	40	20	1.45	Burnasheva, 1978	1518
AB5	CeCo5	0.65	29	50	6	Kuijpers, 1972	96
AB5	CeCo5	0.6	39	20	1.45	Burnasheva, 1978	1517			Lower plateau
AB5	CeFe5	0.7	82	100	0.07	Lundin, 1975	253
AB5	CeNi4.25Mn.75	1.4	24.7	23	1.1	Pourarian, 1985	423
AB5	CeNi4.5Al.5	1.4	21.6	23	9	Pourarian, 1985	423
AB5	CeNi4.5Mn.5	1.2	25.4	23	7	Pourarian, 1985	423
AB5	CeNi5	1.4	14.2	25	50	Lundin, 1977	149
AB5	CeNi5	1.5	22.2	23	80	Klyamkin, 1995	407
AB5	DyNi4.25Ga.75	0.8	30.1	20	6	Miletic, 2000	1213
AB5	DyNi4.5Al.5	1	27.3	20	20	Sorgic, 1996	635
AB5	DyNi4Al	0.8	35.4	20	0.6	Sorgic, 1996	635
AB5	ErNi3.5Al1.5	0.7	39.8	115	2.5	Sorgic, 1996	591
AB5	ErNi4.5Al.5	0.8	25.4	0	25	Sorgic, 1996	591
AB5	ErNi4Al	0.9	32.4	0	2.1	Sorgic, 1996	591
AB5	EuNi5	1.2	26	25	1.3	Gavra, 1985	280
AB5	GdNi4.5Al.5	0.9	32.7	20	7	Sorgic, 1996	635
AB5	GdNi4Al	0.9	41.5	20	0.2	Sorgic, 1996	635
AB5	HoNi4.5Al.5	0.9	24.1	0	22	Sorgic, 1996	635
AB5	HoNi4Al	0.9	35.9	60	4	Sorgic, 1996	635
AB5	LaNi3FeCu	1.1	37.2	22	0.33	Burnasheva, 1984	1528
AB5	LaNi4.25Al.75	1.13	44.1	40	0.054	Diaz, 1979	270
AB5	LaNi4.25Co.5Sn.25	1.4	42.5	25	0.5	Zhang, 1996	679
AB5	LaNi4.4B.6	0.62	33.5	25	0.3	Mendelsohn, 1980	380
AB5	LaNi4.4Zn.6	1.4	34.8	20	0.3	Rozdzynska-Kielbik, 2000	1198
AB5	LaNi4.5Al.5	1.38	38.6	60	0.6	Mendelsoh, 1979	265
AB5	LaNi4.5Al.5	1.4	44.4	25	0.3	Oh, 1998	1187
AB5	LaNi4.5Mn0.3Al0.3	1.3	39.3	35	0.2	Filatova, 2000	1524
AB5	LaNi4.5Si.5	1	36.5	25	0.5	Meli, 1992	674
AB5	LaNi4.65Mn0.2Al0.15	1.5	38.8	20	0.6	Verbetsky, 1989	1529
AB5	LaNi4.6Al.4	1.38	36.4	48	0.64	Mendelsoh, 1979	265
AB5	LaNi4.6Cu0.3Mn0.1	1.4	32	35	1	Ganich, 1999	1521
AB5	LaNi4.6Ga.4		35	20	0.3	Mendlesohn, 1978	116
AB5	LaNi4.6Ge.4	1.2	34.3	30	0.78	Mendlesohn, 1979	486
AB5	LaNi4.6Ge0.4	1.1	34	100	8	Luo, 2002	1514
AB5	LaNi4.6In.4	1.2	39.8	20	0.05	Mendlesohn, 1978	116
AB5	LaNi4.6Mn.4	1.49	39.4	25	0.15	Lundin, 1978	272
AB5	LaNi4.6Si.4	1	35.6	30	0.67	Mendlesohn, 1979	486
AB5	LaNi4.6Si0.4	1	34.2	100	12	Luo, 2002	1514
AB5	LaNi4.6Sn.4	1.26	38.5	20	0.08	Mendlesoh, 1978	116
AB5	LaNi4.6Sn0.4	1.1	38.2	100	4	Luo, 2002	1514
AB5	LaNi4.75Al0.25	1.2	33.7	35	1.2	Filatova, 1999	1522
AB5	LaNi4.7Al.3	1.37	29.7	50	1.2	Groll, 1989	266
AB5	LaNi4.7Al.3	1.44	34	25	0.42	Huston, 1980	77
AB5	LaNi4.7Al0.3	1.3	34.9	20	0.7	Verbetsky, 1989	1529
AB5	LaNi4.7Mn0.3	1.4	36.2	20	0.9	Verbetsky, 1989	1529
AB5	LaNi4.7Si.3	1.1	33.8	25	1	Meli, 1992	674
AB5	LaNi4.85In.15		31.8	30	0.78	Mendlesohn, 1980	487
AB5	LaNi4.8Sn.2	1.4	29.4	25	0.8	Zhang, 1996	679
AB5	LaNi4.8Sn.2	1.4	32.8	25	0.47	Luo, 1995	275
AB5	LaNi4.8Sn0.2	1.2	33.5	35	1.1	Filatova, 1999	1522
AB5	LaNi4.93In.07		35.2	30	1.37	Mendlesohn, 1980	487
AB5	LaNi4.95Sn.05	1.3	32	100	14	Luo, 1998	815
AB5	LaNi4.9Al0.1	1.4	33	35	1.5	Filatova, 2001	1527
AB5	LaNi4.9Mn0.1	1.4	29	35	1.5	Ganich, 1999	1521
AB5	LaNi4.9Sn0.1	1.3	32	35	2.1	Filatova, 2001	1527
AB5	LaNi4Al0.5Cu0.5	1.4	40	22	0.09	Burnasheva, 1984	1528
AB5	LaNi4Cr	0.54	34	25	0.04	Misawa, 1979	118
AB5	LaNi4Cu	1	33.9	60	4	Mendelsohn, 1977	168
AB5	LaNi4Fe	0.8	34.5	40	0.11	Misawa, 1979	118	(+ Fe2.5)
AB5	LaNi4Fe0.5Cu0.5	1.3	36.1	22	0.48	Burnasheva, 1984	1528
AB5	La.8Ce.2Ni4.25Co.5Sn.25	1.2	38.2	25	0.8	Zhang, 1996	679
AB5	La.8Ce.2Ni4.8Sn.25	1.2	32.4	25	1.1	Zhang, 1996	679
AB5	La0.13Ce0.35Pr0.52Co5	0.8	40	50	3.6	Sarynin, 1981	1526
AB5	La0.1Ce0.9Co5	0.6	41	20	0.84	Burnasheva, 1978	1518
AB5	La0.2Ce0.8Co5	0.6	44	20	0.72	Burnasheva, 1978	1518
AB5	La0.2Pr0.8Co5	0.7	38	20	0.23	Burnasheva, 1978	1517			Lower plateau
AB5	La0.4Ce0.6Co5	0.6	38	20	0.65	Burnasheva, 1978	1518
AB5	La0.4Pr0.6Co5	0.9	29	20	17	Burnasheva, 1978	1517			Upper plateau
AB5	La0.65Ce0.28Pr0.07Co5	1	47	50	1.1	Sarynin, 1981	1526
AB5	La0.66Ce0.2Pr0.14Co5	1	41	50	0.9	Sarynin, 1981	1526
AB5	La0.6Pr0.4Co5	0.9	43	20	0.17	Burnasheva, 1978	1517			Lower plateau
AB5	La0.75Ce0.25Ni4Cu0.8Al0.2	1.4	33.5	22	0.7	Petrova, 1989	1520
AB5	La0.75Ce0.25Ni4Cu0.9Al0.1	1.4	32.9	22	1	Petrova, 1989	1520
AB5	La0.75Ce0.25Ni4Cu0.9Ti0.1	1.4	38.4	22	1.1	Petrova, 1989	1520
AB5	La0.75Pr0.25Ni4.5Cu0.3Al0.2	1.4	34.2	22	0.8	Petrova, 1989	1520
AB5	La0.7Ce0.3Co5	0.7	42	20	0.17	Burnasheva, 1978	1518			Lower plateau
AB5	La0.8Ce0.2Co5	0.8	34	20	0.18	Burnasheva, 1978	1518
AB5	La0.8Pr0.2Co5	0.9	38	20	0.11	Burnasheva, 1978	1517			Lower plateau
AB5	LaCo5	0.8	42.4			Shilov, 1983	531
AB5	LaCo5	0.99	40	50	0.2	Kuijpers, 1972	96
AB5	LaCo5	1	42.3	30	0.06	Ishikawa, 2002	1510
AB5	LaCu5	0.8	42.7	101	5	Spada, 1987	255
AB5	LaNi2Cu3	0.9	32	35	1.1	Ganich, 1999	1523
AB5	LaNi2FeCu2	1.1	36.9	22	0.55	Burnasheva, 1984	1528
AB5	LaNi3.92Al.98	1.1	42	250	5	Ivanova, 1997	639
AB5	LaNi3Cr0.5Cu1.5	1.1	35.5	22	0.62	Burnasheva, 1984	1528
AB5	LaNi3Cu2	1.1	33	35	1.8	Ganich, 1999	1523
AB5	LaNi5	1.4	29.1	20	1.7	Zhang, 1989	262	(Chemically recovered)
AB5	LaNi5	1.4	29.5	21	1.5	Shilov, 1988	672
AB5	LaNi5		37.7	0	0.4	Mikheeva, 1976	668
AB5	LaNi5	1.4	29.7	0	0.5	Mikheeva, 1976	668
AB5	LaNi5	1.5	31.8	15	1	Murray, 1981	261
AB5	LaNi5	1.5	30.2	25	1.7	Luo, 1998	815
AB5	LaNi5	1.5	30.8	25	1.8	Lundin, 1975	260
AB5	LaNi5	1.5	28.5	-55	0.06	Andreev, 1978	670	Low temperature data
AB5	LaNi5	1.5	30.1	21	2.4	van Vucht, 1970	93
AB5	LaNi5	1.8	30.1	-40	0.1	Semenenko, 1977	504
AB5	LaNi5.2Mn0.05Al0.05	0.8	26.8	20	1.3	Verbetsky, 1989	1529
AB5	LaNi5.5Mn0.1Al0.05	1	26	20	1.6	Verbetsky, 1989	1529
AB5	LaNi6.37Mn0.33	0.8	23.2	20	2	Verbetsky, 1989	1529
AB5	LaNiCo4	1	45	40	0.15	Colinet, 1987	569
AB5	NdCo5	0.62	42.7	22	0.7	van Mal, 1976	103
AB5	NdNi4.6Sn.4	1	26.4	20	1.4	Takaguchi, 2000	1196			sloping plateau
AB5	NdNi4.8Sn.2	1.1	25.7	20	6.5	Takaguchi, 2000	1196
AB5	NdNi4.9Sn.1	1.2	27.9	20	10	Takaguchi, 2000	1196
AB5	NdNi5	0.9	27.9	20	16	Takaguchi, 2000	1196
AB5	NdNi5	1.03	28			Gruen, 1977	162
AB5	NdNi5	1.27	21.6	20	20	Uchida, 1982	131
AB5	NdNi5	1.36	26.3	23	13	Anderso, 1973	99
AB5	NdNi5	1.33	27.8	30	18	Gruen, 1977	168
AB5	PrCo5	0.7	34.3	100	13.5	Clinton, 1975	102
AB5	PrCo5	0.8	40	20	0.49	Burnasheva, 1978	1517			Lower plateau
AB5	PrNi2.5Cu2.5	0.8	19.3	23	25	Pourarian, 1986	254	(+ Cu1)
AB5	PrNi4.5Fe.5	1.26	20.5	23	6	Pourarian, 1986	254
AB5	PrNi5	1.58	30.5	23	8	Anderso, 1973	99
AB5	PrNi5	1.4	26.4	20	20	Uchida, 1982	131
AB5	PrNi5	1.4	29	20	10	Matsumoto, 1987	568
AB5	SmCo5	0.64	34.9	20	3.2	Kuijpers, 1971	94
AB5	SmCo5	0.7	30	25	5	Yamaguchi, 1983	156
AB5	TbNi4.5Al.5	1.1	26.9	20	10	Sorgic, 1996	635
AB5	TbNi4Al	0.9	33.7	20	0.9	Sorgic, 1996	635
AB5	YCo5	0.73	32.2	31	28	Takeshita, 1974	101
AB5	YCo5	0.9	28.5	0	10	Sarynin, 1977	667
AB5	YNi4.25Al.75	1.1	24.3	21	6	Sorgic, 1998	812
AB5	YNi4.5Al.5	1.1	22.4	20	20	Sorgic, 1998	812
AB5	YNi4Al	1	40.8	60	3	Sorgic, 1998	812
MIC	Ce3Al	1.9	111.8			Yakovleva, 1992	1157		(cal)
MIC	Ce7Ni3	1.6	152			Busch, 1978	189
MIC	CeCo3	1.6	38.1	50	0.2	Burnasheva, 1977	543
MIC	CeCo3	1	38.1	79	0.3	Tauber, 1976	529
MIC	CePtAl	0.3	24	22	1.2	Bobet, 2002	1348
MIC	Dy2Co7	1.1	35.8	50	2	Goudy, 1976	186
MIC	Dy2Co7	1.1	34.2	50	2	Ming, 1999	1300
MIC	DyCo3	1.3	42	100	3	Wallace, 1980	439
MIC	DyCo3	1.4	42.7	50	0.3	Burnasheva, 1977	543
MIC	DyFe3	1	47.1	150	0.4	Goudy, 1976	186
MIC	DyFe3	1.1	45.7	20	0.001	Kierstead, 1980	449
MIC	Er2Co7	1.3	29.6	50	8	Goudy, 1976	186
MIC	Er6Fe23	0.8	19	0	2	Smith, 1983	612
MIC	Er6Mn23	0.5	32.3			Smith, 1987	692
MIC	ErCo3	1.2	38	100	10	Wallace, 1980	439
MIC	ErCo3	1.3	39.8	50	0.2	Burnasheva, 1977	543
MIC	ErFe3	0.8	42.9	150	1.15	Goudy, 1976	186
MIC	ErNi3	1.5	23.8	-40	1.2	Verbetsky, 1996	636
MIC	Gd2Co7	0.9	40	100	6	Goudy, 1976	186
MIC	Gd3Ni6Al2	1	33.6	300	5.6	Pechev, 1997	839
MIC	GdCo3	1.3	42.6	20	0.015	Kierstead, 1981	444
MIC	GdCo3	1.4	45	150	3	Wallace, 1980	439
MIC	GdFe3	1	50.4	150	0.18	Goudy, 1976	186
MIC	Ho2Co7	1.1	36.7	50	5	Goudy, 1976	186
MIC	Ho6Fe23	0.8	24.3	0	0.3	Smith, 1983	612
MIC	Ho6Mn23	0.5	34.6			Smith, 1987	692
MIC	HoCo3	1.2	36	100	6	Wallace, 1980	439
MIC	HoFe3	1	44.6	150	0.63	Goudy, 1976	186
MIC	La.5Ca.5Ni3	1.6	43.5	20	0.6	Chen, 2000	1316
MIC	La.5Ca1.5MgNi9	1.9	35.4	20	0.7	Chen, 2000	1316
MIC	La7Ni3	1.7	152			Busch, 1978	189
MIC	LaCaMgNi6Al.3	1.9	30	20	0.4	Chen, 2000	1295			Sloping plateau
MIC	LaCaMgNi6Al3	1.8	30	20	0.4	Chen, 2000	1316			Sloping plateau
MIC	LaCaMgNi6Mn.3	1.8	32.3	20	1	Chen, 2000	1295
MIC	LaCaMgNi6Mn3	1.8	32.3	20	1.3	Chen, 2000	1316
MIC	LaCaMgNi9	1.8	33	20	2.5	Chen, 2000	1295
MIC	LaCaMgNi9	1.8	33	20	2.5	Chen, 2000	1316
MIC	LaMg2Cu2	2.4	64.2	170	0.4	Kadir, 1999	1305
MIC	Lu6Fe23	0.6	39.7	0	2	Smith, 1983	612
MIC	LuCo3	1	32	20	5.9	Kierstead, 1984	571
MIC	Mg51Zn20	3.6	80.9	330	8	Bruzzone, 1983	431
MIC	Mg6Pd	0.9	80.3	160	0.014	Kume, 1987	576
MIC	Nd2Co7	1.2	56.7	125	0.9	Goudy, 1976	186
MIC	NdCo3	1.3	54.5	20	0.29	Kierstead, 1981	444
MIC	Pr2Co7	0.7	33.3	100	10	Clinton, 1975	102
MIC	Pr2Co7	1.1	54.6	150	2	Goudy, 1976	186
MIC	PrCo3	1.3	54.2	100	0.02	Clinton, 1975	102
MIC	Sm2Fe17	0.4	75			Kuji, 2002	1347			No plateau
MIC	SmCo3	0.6	59.4	69	0.2	Tauber, 1976	529
MIC	Tb2Co7	1.1	40.4	50	2	Goudy, 1976	186
MIC	TbCo3	1.3	44	100	1.5	Wallace, 1980	439
MIC	TbCo3	1.4	46.9	75	0.6	Burnasheva, 1977	543
MIC	TbFe3	1.1	48	150	0.23	Goudy, 1976	186
MIC	ThNiAl	0.9	47	40	0.007	Drulis, 1982	434
MIC	Ti3Al	2.9	47	50	0.8	Rudman, 1978	191
MIC	Ti3Sb	0.8	110			Rao, 1982	533
MIC	Ti3Sn	0.34	101			Rudman, 1978	193
MIC	Ti4Cu2O	0.8	31			Takeshita, 2000	1313			No plateau
MIC	UNiAl	0.8	48			Drulis, 1982	434
MIC	Y2Co7	1.3	38	20	0.25	Yamaguchi, 1985	573
MIC	Y4.3Sc.7Si2.6Ge.4	0.5	39.4	426	1.5	McColm, 1987	611
MIC	Y5Si3	0.4	53.3	398	0.3	McColm, 1986	574
MIC	Y5Si3C.3	1.1	44.7			Hassen, 2000	1325
MIC	Y5Si3C.5	1.4	39.5			Hassen, 2000	1325
MIC	YCo3	1.5	44	75	0.45	Yamaguchi, 1985	573
MIC	Zr.1Tb.9Fe1.5Co1.5	1.1	21	75	0.5	Sivakumar, 2000	1315			Sloping plateau
MIC	Zr.2Tb.8Fe1.5Co1.5	0.8	20	75	1	Sivakumar, 2000	1340			Sloping plateau
MIC	Zr2Ni5	0.5	35	60	0.8	Spit, 1982	446
MIC	Zr7Ni10	1.4	47	60	0.25	Spit, 1982	446
MIC	(La.65Ca.35)(Mg1.32Ca.68)Ni9		26.8	10	2	Kadir, 2000	1314
MIC	(Y.5Ca.5)(MgCa)Ni9	2	25.8	-10	2	Kadir, 1999	1304			Sloping plateau
MIC	CaNi3	2	35	20	0.4	Chen, 2000	1316
MIC	CaNi3	2.1	58			Oesterreicher, 1980	43
MIC	CaTiMgNi9	1.9	33.4	20	1	Chen, 2000	1295
MIC	CaTiMgNi9	1.9	33.4	20	1.1	Chen, 2000	1316
MIC	Ce2Co7	0.9	43.3	100	0.9	Goudy, 1976	186
SS	Pd.95Co.05	0.6	38.2	81	0.6	Feenstra, 1987	609
SS	Pd.95Cr.05	0.6	29.6	30	0.26	Ura, 1995	484
SS	Pd.95Ni.025Rh.025	0.7	32.6	50	0.32	Sakamoto, 1995	603
SS	Pd.95Ni.05		31.6	50	1.4	Holder, 1996	624
SS	Pd.95Pt.05	0.6	29	25	0.3	Thiebaut, 1995	482
SS	Pd.95Pt.05	0.6	33	30	0.17	Noh, 1995	481
SS	Pd.95Rh.05	0.7	28	25	0.21	Thiebaut, 1995	482
SS	Pd.95Rh.05	0.7	34.2	30	0.13	Sakamoto, 1994	868
SS	Pd.95Sb.05	0.5	34.6	100	0.07	Sakamoto, 1996	637
SS	Pd.95Sc.05	0.5	37.4	50	0.04	Sakamoto, 1993	604
SS	Pd.96Pt.04	0.5	37.4	80	0.4	Yasumatsu, 1999	1406
SS	Pd.972Ir.028	0.5	30.7	25	0.1	LaPrade, 1974	469
SS	Pd.975Mo.025	0.5	30.8	30	0.16	Ura, 1995	484
SS	Pd.975Rh.025	0.7	36	30	0.056	Sakamoto, 1994	868
SS	Pd.98V.02	0.5	30.8	25	0.1	Artman, 1976	485
SS	Pd.9Co.1	0.5	29.8	80	4	Feenstra, 1987	609
SS	Pd.9Ni.05Rh.05	0.6	28.4	30	0.7	Sakamoto, 1995	603
SS	Pd.9Pt.1	0.4	27.4	25	2	Thiebaut, 1995	482
SS	Pd.9Rh.1	0.6	29.2	30	0.58	Sakamoto, 1994	868
SS	Pd.9Rh.1	0.7	24	25	1.03	Thiebaut, 1995	482
SS	Pd.9Rh.1	0.7	32.4	50	0.6	Noh, 1993	867
SS	Ti.23Mn.36V.41	2.8	34	40	4	Cho, 2000	1407			Sloping plateau
SS	(V.59Ti.41).74Mn.26		52.7	25	0.03	Libowitz, 1988	353
SS	(V.63Ti.37).8Mn.1Fe.1		44.7	25	0.03	Libowitz, 1988	353
SS	(V.85Ti.15).92Mn.08		50.6	25	0.06	Libowitz, 1988	353
SS	(V.89Ti.11).95Fe.05	3.3	42.9	40	4.5	Libowitz, 1987	697
SS	(V.8Ti.2).86Mn.14		48.6	25	0.04	Libowitz, 1988	353
SS	(V.8Ti.2).88Mn.08Fe.04		48.5	25	0.08	Libowitz, 1988	353
SS	(V.8Ti.2).9Al.05Fe.05		46.8			Libowitz, 1988	353
SS	(V.9Ti.1).95Fe.05	3.7	43.2	80	9.3	Lynch, 1985	351
SS	(V.9Ti.1).95Ge.05		47.3			Libowitz, 1988	353
SS	(V.9Ti.1).9Al.05Fe.05		42.8			Libowitz, 1988	353
SS	Nb.95Cr.05	0.9	47.2	77	0.26	Esayed, 2000	1419
SS	Nb.97Cr.03	0.9	47.2	77	0.45	Esayed, 2000	1419
SS	Ni.8Cu.2		5.1	25	3800	Baranowski, 1985	546
SS	Pd.75Rh.25	0.8	25.4	0	5	Noh, 1993	867
SS	Pd.7Ag.3	0.3	46	50	0.002	Brodowsky, 1965	527
SS	Pd.825Ni.1Rh.075	0.7	21.4	30	6.3	Sakamoto, 1995	603
SS	Pd.85Rh.15	0.7	31	50	2.7	Noh, 1993	867
SS	Pd.88Pt.06Rh.06	0.5	24.8	0	0.3	Sakamoto, 1997	661
SS	Pd.8Rh.2	0.8	28.4	30	4.8	Noh, 1993	867
SS	Pd.90Pt.10	0.3	30.7	80	3	Yasumatsu, 1999	1406
SS	Pd.91Co.09		27.2	20	4	Holder, 1996	624
SS	Pd.91Ni.09		29.4	50	6.8	Holder, 1996	624
SS	Pd.925Rh.075	0.7	32.4	30	0.3	Sakamoto, 1994	868
SS	Pd.927Ir.073	0.1	17	25	0.6	LaPrade, 1974	469
SS	Pd.92Pt.08	0.4	30.7	80	1.8	Yasumatsu, 1999	1406
SS	Pd.942Ir.058	0.4	25.9	25	0.35	LaPrade, 1974	469
SS	Pd.952Ti.048	0.4	27.2	100	2.3	Evans, 1980	462
SS	Pd.95Bi.05	0.4	37.8	100	0.16	Sakamoto, 1996	637
SS	Pd.95Co.05		31.8	50	1.8	Holder, 1996	624
SS	V.855Cr.145	2.3	29.7	50	50	Lynch, 1978	84
SS	V.8Ti.2	3	48.1	80	2	Ono, 1980	452
SS	V.8Ti.2	3.4	60	110	1.8	Sirotina, 1995	1158		(cal)
SS	Zr.975Nb.025	2.2	219	800	0.2	Sinha, 1970	472

## Sheet: with entropy
comp	H2_wtpercent	Enthalpy	Temp_C	P_atm	Entropy	Phase
Th1.5Ce.5Al	0.4	133	650	0.0003	76.768	A2B
Th2Al	0.8	130	500	0.001	110.842	A2B
Ti2Cu	2.2	130	500	0.12	150.578	A2B
Ti2Pd	1.4	90	null	null	null	A2B
Zr2Cu	1.3	144	600	0.003	116.733	A2B
Zr2Cu	1.3	142	700	0.02	113.471	A2B
Zr2Ni	1.3	183	604	0.003	160.45	A2B
Hf2Fe	1.1	70	277	0.38	119.242	A2B
Mg1.5Ni	2.6	29.1	300	3.7	61.6445	A2B
Mg1.75Ni	2.8	26.6	300	4.5	58.9062	A2B
Mg1.92Al.08Ni	3.5	70.5	295	4	135.626	A2B
Mg1.9Ti.1Ni	2.9	62.5	300	2.5	116.68	A2B
Mg2Co	4.5	76	450	16	128.13	A2B
Mg2Co	4.2	108	418	5.7	170.741	A2B
Mg2Cu	2.6	72.9	295	6	143.217	A2B
Mg2Fe	5.5	77.2	450	25	133.494	A2B
Mg2Ni	3.1	31.3	300	3.7	65.4839	A2B
Mg2Ni	3.2	61	250	1.1	117.426	A2B
Mg2Ni	3.3	67	300	2.2	123.473	A2B
Mg2Ni	3.3	65.9	300	3.2	124.663	A2B
Mg2Ni	3.3	63.2	300	3.1	119.687	A2B	110.119
Mg2Ni	3.5	64.4	180	0.09	122.177	A2B	34.4988
Mg2Ni	3.5	64.4	180	0.07	120.091	A2B
Mg2Ni	3.5	68.6	180	0.05	126.57	A2B
Mg2Ni	3.6	64.5	299	3.2	122.416	A2B
Mg2Ni	3.6	64.6	300	2.5	120.345	A2B
Mg2Ni	3.6	68.8	180	0.06	128.525	A2B
Mg2Ni	3.6	71.3	300	2.6	132.364	A2B
Mg2Ni	3.7	62.2	450	57	119.588	A2B
Mg2Ni.75Co.25	3.1	64.5	279	1	116.848	A2B
Mg2Ni.75Cr.25	3	59.9	248	1	114.971	A2B
Mg2Ni.75Cu.25	null	53.2	227	1	106.4	A2B
Mg2Ni.75Fe.25	2.8	63.2	253	1	120.152	A2B
Mg2Ni.75Fe.25	3.3	65.2	300	1.9	119.114	A2B
Mg2Ni.75V.25	2.9	62.4	250	1	119.312	A2B
Mg2Ni.75Zn.25	3.3	61.5	246	1	118.497	A2B
Mg2Ni0.75Co0.25	3.2	61	250	0.5	110.882	A2B
Mg2Ni0.75Cr0.25	3.2	61	250	0.9	115.76	A2B
Mg2Ni0.75Cu0.25	3.2	59	250	1.2	114.324	A2B
Mg2Ni0.75Fe0.25	3.2	60	250	1	114.723	A2B
Mg2Ni0.75Mn0.25	3.2	58	250	1	110.899	A2B
Mg2Ni0.75Ti0.25	3.2	56	250	1.2	108.588	A2B
Mg2Ni0.75Ti0.25	3.2	59	250	1.3	114.988	A2B
Mg2Ni0.7Zr0.3	3.5	59.8	340	10	116.664	A2B
ThCo	1.4	46.8	40	0.05	124.656	AB
ThNi	1.2	45.3	40	0.01	106.506	AB
Ti.46Fe.45V.05Mn.05	1.7	28.6	22	2	102.702	AB
Ti.96Zr.04Fe.95Nb.04	1.7	31.8	30	1.4	107.743	AB
Ti.9Fe.9B.2	1.5	7.6	27	14	47.2375	AB
Ti.9La.1Co	1.5	60	150	3.2	151.498	AB
Ti.9Zr.1Fe	1	28.9	30	3.3	105.289	AB
TiCo	1.1	61.1	150	2.2	150.989	AB
TiCo	1.3	57.8	150	2.2	143.187	AB
TiCo	1.4	57.4	155	4	145.618	AB
TiCo	1.45	54	152	2	132.812	AB
TiCo.5Fe.5	1.1	42.3	100	4	124.911	AB
TiCo.5Mn.5	1.6	46.9	120	3.2	128.993	AB
TiCu	1.7	75	200	0.004	112.734	AB
TiCu	1.6	126	500	0.15	147.255	AB
TiFe	1.7	26.7	51	11	102.31	AB
TiFe	1.9	28.1	30	5.2	106.423	AB
TiFe.5Co.5	1.1	41.4	150	12	118.497	AB
TiFe.6Ni.4	1.5	48.6	50	0.035	122.639	AB
TiFe.7Mn.2	2	34.7	40	1.4	113.655	AB
TiFe.8Be.2	1.4	30.5	21	0.7	100.781	AB
TiFe.8Ni.15V.05	1.3	41	150	7	113.078	AB
TiFe.8Ni.2	1	41.9	50	0.28	119.156	AB
TiFe.8Ni.2	1.3	41.2	50	0.33	118.352	AB
TiFe.95Mn.05	1.6	29.3	50	9	108.949	AB
TiFe.9Al.1	1.3	30	25	1.2	102.184	AB
TiFe.9Co.1	1.5	30.6	50	5	108.095	AB
TiFe.9Cr.1	1.1	30.5	150	20	96.9686	AB
TiFe.9Mn.1	1.2	27.2	100	30	101.152	AB
TiFe.9Mn.1	1.9	29.5	25	2.6	106.924	AB
TiFe.9Ni.1	1.4	35.6	50	1.8	115.095	AB
HfCo	1.3	43	270	1	79.1897	AB
HfCo	1.3	59	50	0.001	125.328	AB
HfNi	1.3	40	190	1	86.3931	AB
HfNi	1.3	50	50	0.02	122.329	AB
LaNi	1.3	118	null	null		AB
LaNi	1.9	100	null	null		AB
LaNi	2	126	null	null		AB
Li.94Pd	0.9	69.2	300	0.02	88.2981	AB
LiPd	0.7	75.3	null	null		AB
LiPt	0.6	134	null	null		AB
LuNi	1.2	100	null	null		AB
TiNi	1.4	58	null	null		AB
UCo	0.6	55	150	0.08	109.06	AB
YbNi	1.2	147	null	null		AB
YbPd	1	67	null	null		AB
Zr.5Hf.5Co	1.1	76.2	200	0.2	147.741	AB
Zr.7Hf.3Co	1.4	80.3	200	0.03	140.663	AB
ZrCo	1.2	90	252	0.05	146.564	AB
ZrCo	1.7	76.3	200	0.005	117.335	AB
ZrCo	2	66	430	1	93.8834	AB
ZrCo	1.6	67	200	0.013	105.604	AB
ZrCo.84Ni.16	1.6	83	250	0.01	120.477	AB
ZrNi	1.2	47.5	300	0.005	38.921	AB
ZrNi	1.7	40.1	250	0.2	63.3147	AB
ZrNi	1.8	76.8	250	0.26	135.664	AB
ZrNi	2	64	300	1	111.693	AB
CaNi2	2.1	85	25	0.05	260.37	AB2
CeMg2	3.1	101	216	0.1	187.433	AB2
DyFe2	1.5	58	80	0.0001	87.8601	AB2
ScMn2	2.3	63	null	null		AB2
Th1.5Ce.5Al	0.4	133	650	0.0003	76.768	AB2
ThNi2	1.1	44.7	null	null		AB2
ThZr2	0.5	413	910	0.08	328.149	AB2
Ti.5Zr.5Mn1.2Fe.3	1.9	39	120	1.5	102.602	AB2
Ti.5Zr.5Mn2	1.8	40	70	1.5	119.983	AB2
Ti.5Zr.5V.5Ni1.3Zr.2	1.6	38.8	null	null		AB2
Ti.6Zr.4Mn1.4Cr.4Cu.2	1.8	48	20	0.3	153.83	AB2
Ti.6Zr.4Mn1.9Cu.1	1.7	40.6	20	0.5	132.813	AB2
Ti.7Zr.3Mn1.9Mo.1	1.7	41	17	0.9	140.505	AB2
Ti.8Zr.2Cr1.8	null	23	0	3	93.3676	AB2
Ti.8Zr.2CrMn	null	30	0	2	115.643	AB2
Ti.8Zr.2Mn.8Cr1.0Fe.2	1.8	28	20	12	116.188	AB2
Ti.8Zr.2Mn1.2Cr.8	2	28.9	20	5	111.993	AB2
Ti.8Zr.2Mn1.2V.2Cr.6	1.9	30.5	20	2.2	110.64	AB2
Ti.8Zr.2Mn1.4V.2Cr.4	1.9	29	20	9	117.213	AB2
Ti.8Zr.2Mn1.5Cr.5	2	27.5	30	10	109.871	AB2
Ti.8Zr.2Mn1.5Cu.5	1.6	27	30	3	98.2274	AB2
Ti.8Zr.2Mn1.5Fe.5	1.7	25.4	30	11	103.731	AB2
Ti.8Zr.2Mn1.5V.5	2	45.6	30	0.5	144.742	AB2
Ti.8Zr.2Mn1.6V.2Cr.2	1.9	30.5	20	2	109.849	AB2
Ti.8Zr.2Mn1.7V.2Mo.1	2	35	14	1	121.951	AB2
Ti.8Zr.2Mn1.8Mo.2	1.7	29	20	4	110.482	AB2
Ti.8Zr.2V.6Mn.2Pd.1Ni.8Fe.2	1.3	46.5	25	0.01	117.817	AB2
Ti.95Zr.05Cr1.2Mn.8	1.7	21.9	20	5.5	88.8934	AB2
TiV1.4Ni.6	2.9	28.8	60	0.4	78.8813	AB2
TiV1.6Ni.4	3.3	33.2	120	1	84.4784	AB2
TiV1.8Ni.2	3.6	35.3	90	0.08	76.2816	AB2
TmFe2	1.6	56.8	80	0.003	112.691	AB2
UNiAl	0.5	74.6	100	0.0003	132.673	AB2
YCo2	2	31	null	null		AB2
YNi2	1.7	44	null	null		AB2
Zr(Fe.75Cr.25)2	1.4	25.6	45	3	89.6216	AB2
Zr(Ni.6V.2Mn.2)2.4	1.6	39.9	30	0.3	121.69	AB2
Zr.2Ho.8CoFe	3.3	42.782	27	9	160.844	AB2
Zr.2Ho.8Fe.5Co1.5	1.3	43.038	27	4	154.966	AB2
Zr.5Ti.5CrFe	1.8	27	23	4	102.722	AB2
Zr.6Ho.4Co2	1	29.3	50	2	96.4652	AB2
Zr.76Ti.24Ni1.16Mn.63V.14Fe.18	1.6	29.7	30	5	111.378	AB2
ZrCr2Fe.8	1.2	46.5	100	0.8	122.813	AB2
ZrCr2Ni.8	1.4	37.9	100	1	101.609	AB2
ZrCrFe	1.6	36	51	2	116.864	AB2
ZrCrFe1.2	1.4	34	120	7	102.665	AB2
ZrCrFe1.6	1.2	29.1	30	2.5	103.645	AB2
ZrCrFe1.8	1.3	19	23	6	79.0608	AB2
ZrCrFeCo.8	1.1	20	0	10	92.3715	AB2
ZrCrFeCu.8	1.2	28	23	3	103.713	AB2
ZrCrFeMn.8	1.4	32	23	0.6	103.868	AB2
ZrCrFeNi.8	1.1	21	0	8	94.1824	AB2
ZrFe1.4Cr	1.7	21	23	1	70.9459	AB2
ZrFe1.4Cr.6	1.5	29.9	20	3	111.166	AB2
ZrFe1.5Cr	1.5	23	23	1.5	81.0681	AB2
ZrFe1.5Cr.5	1.4	24.3	50	5.5	89.3816	AB2
ZrFe1.5Cr.5	1.5	25.6	20	5	100.73	AB2
ZrFe1.5V.5	1.6	32.2	50	0.25	88.1842	AB2
ZrFe1.6Al.4	1	36	24	10	140.324	AB2
ZrFeCr	1.7	49.4	50	0.1	133.83	AB2
ZrFeMn	1.6	31	150	10	92.3975	AB2
ZrFeMo	1.2	29.8	30	0.6	94.11	AB2
ZrFeV	1.6	48.1	50	0.0012	93.0953	AB2
ZrMn1.11Fe1.22	1.3	29.4	30	2	102.783	AB2
ZrMn1.11Fe1.22	1.5	13.3	100	5	49.0152	AB2
ZrMn1.22Fe1.11	1.5	13	23	1	43.9189	AB2
ZrMn1.22Fe1.14	1.2	31	40	2	104.795	AB2
ZrMn1.2Fe0.4	1.5	33	50	0.4	94.562	AB2
ZrMn1.53Fe1.27	1	9	23	4	41.9116	AB2
ZrMn1.8	1.6	38.8	50	0.1	101.012	AB2
ZrMn2	null	38	null	null		AB2
ZrMn2	1.5	36	210	3	83.6526	AB2
ZrMn2	1.7	37.4	50	0.01	77.5666	AB2
ZrMn2	1.8	53.2	80	0.03	121.604	AB2
ZrMn2.5	1.4	32	50	0.07	76.9993	AB2
ZrMn2.6Fe.2	1.4	15	100	0.12	22.6163	AB2
ZrMn2.7	1.3	33.6	100	3	99.1989	AB2
ZrMn2.8	null	29.9	23	0.3	91.0205	AB2
ZrMn2.8	1.5	18.4	23	0.4	54.5569	AB2
ZrMn2.8Fe.4	1.2	23	100	0.12	44.064	AB2
ZrMn2Co.8	null	20.9	23	4	82.1144	AB2
ZrMn2Co.8	0.9	19.3	23	3.5	75.6006	AB2
ZrMn2Cu.8	null	31.6	23	0.06	83.4054	AB2
ZrMn2Cu.8	1.4	27	50	0.06	60.24	AB2
ZrMn2Fe.8	null	25	23	0.5	78.7063	AB2
ZrMn2Fe.8	1.2	29.3	30	2	102.453	AB2
ZrMn2Fe.8	1.4	12.7	23	0.7	39.945	AB2
ZrMn2Fe1.2	0.7	6.8	25	3	31.9373	AB2
ZrMn2Ni.8	null	25	23	1.6	88.3605	AB2
ZrMn2Ni.8	1.3	18.6	23	3	71.9563	AB2
ZrMn3	1.3	29.2	50	0.6	86.1626	AB2
ZrMn3.8	1.2	17	30	0.7	53.1452	AB2
ZrMnFe	0.1	20.4	null	null		AB2
ZrMnFe.7Co.3	1.2	17.6	30	4	69.5921	AB2
ZrMo2	0.3	38.5	null	null		AB2
ErFe2	1.1	56.2	130	0.013	103.409	AB2
ErFe2	1.5	57.9	80	0.001	106.688	AB2
GdCo2	1.4	54	null	null		AB2
GdCo2	1.5	31	null	null		AB2
GdCo2	1.5	48	200	2	107.233	AB2
GdFe2	1.5	29	292	1	51.3274	AB2
GdMn2	1.1	87.5	360	1	138.231	AB2
GdNi2	1.5	90	300	1	157.068	AB2
GdRh2	0.9	49	142	6	132.944	AB2
GdRu2	1	60	225	3	129.6	AB2
Ho.6Zr.4Co2	null	30	27	0.06	76.6487	AB2
Ho.6Zr.4Co2	1	33	50	0.2	88.8088	AB2
Ho.6Zr.4Fe2	null	18	null	null		AB2
Ho.8Zr.2Co2	null	13	27	0.06	19.982	AB2
Ho.8Zr.2Co2	1.2	25	50	0.2	64.041	AB2
Ho.8Zr.2Fe2	null	24	null	null		AB2
LaNi2	1.9	79.5	null	null		AB2
LaRh2	1.4	44.3	244	2	91.4398	AB2
LiPd2	0.8	51	300	0.16	73.7948	AB2
MgYNi4	1.05	35.8	40	4	125.883	AB2
PrCo2	1.5	67	100	0.001	122.29	AB2
Ti.98Zr.02Mn1.5V.43Fe.09Cr.05	1.9	27.4	20	9	111.752	AB2
Ti.98Zr.02V.43Fe.09Cr.05Mn1.5	1.6	23.3	20	20	104.387	AB2
Ti.9Zr.15Mn1.6Cr.2V.2	2.1	15.4	25	7	67.8289	AB2
Ti.9Zr.2Mn1.4Cr.4(VFe).2	2.1	25.5	25	3	94.689	AB2
Ti.9Zr.2Mn1.4Cr.4V.2	2.1	26.7	25	1.9	94.9247	AB2
Ti.9Zr.2Mn1.6Cr.2(VFe).2	2.1	30	25	7	116.822	AB2
Ti.9Zr.2Mn1.6Ni.2(VFe).2	2	23.2	25	3.6	88.4841	AB2
Ti.9Zr.2Mn1.6Ni.2V.2	2.1	31.7	25	2.7	114.62	AB2
Ti.9Zr.2Mn1.8(VFe).2	2	29.1	25	3	106.769	AB2
Ti.9Zr.2Mn1.8V.2	2.1	26	25	3	96.3668	AB2
Ti.9Zr.3Mn1.3Cu.05Mo.05V.2Cr.2	2	15.2	20	0.06	28.5258	AB2
Ti0.9Zr.1MnCr.9V.1	1.7	22.5	30	24	100.635	AB2
Ti1.2Cr1.9Mn.1	1.8	20.1	-10	19.4	101.038	AB2
Ti1.2CrMn	2	25.5	-10	5.7	111.404	AB2
TiCr1.8	null	19	0	70	104.86	AB2
TiCr1.8	1.9	19.7	-32	20	106.607	AB2
TiCr1.8	2.43	20.2	-20	40	110.46	AB2
TiCr2	0.8	23	20	40	109.116	AB2
TiCr2	1.8	29.7	-40	2	133.221	AB2
TiCrMn	null	24	0	18	111.902	AB2
TiCrMn	2.1	19.6	40	190	106.17	AB2
TiCrMn.85Fe.3V.15	1.6	20.9	20	6	86.2027	AB2
TiMn1.3Fe.11	1.7	32.7	24	6	124.973	AB2
TiMn1.4Ni.1	null	28	0	2	108.317	AB2
TiMn1.5	null	27	0	5	112.259	AB2
TiMn1.5	1.9	28.7	20	7	114.103	AB2
TiMn1.5	1.9	27.9	0	1.8	107.076	AB2
TiMn2	1.7	24.6	0	20	114.974	AB2
Zr.79Ti.21MnFe1.02	1.5	33	30	1.5	112.276	AB2
Zr.7Ti.3Cr.6Fe1.4	1.5	22	23	7	90.4754	AB2
Zr.7Ti.3CrFe	1.7	30	23	0.8	99.4993	AB2
Zr.7Ti.3Mn2Fe.8	0.8	14	25	2.6	54.9106	AB2
Zr.7Ti.3MnFe	1.7	10	23	2	39.5369	AB2
Zr.8Ti.2Cr.6Fe1.4	1.6	27	23	3	100.335	AB2
Zr.8Ti.2FeMn	1.4	30	30	1.6	102.911	AB2
Zr.8Ti.2MnFe	1.7	11	23	1	37.1622	AB2
Zr.9Ti.1Cr.55Fe1.45	1.6	1.03	10	2	9.3927	AB2
ZrCo1.5V.5	1.5	34.3	50	1.5	109.557	AB2
ZrCoCr	1.6	40.2	50	0.7	121.498	AB2
ZrCoV	1.8	49.4	50	0.0023	102.52	AB2
ZrCr.6Fe1.4	1.5	27	23	0.8	89.3641	AB2
ZrCr1.2Fe.8	1.4	50.2	70	0.75	143.968	AB2
ZrCr1.2Ni.8	2	56.4	70	0.25	152.925	AB2
ZrCr2	null	36	null	null		AB2
ZrCr2	1.8	42	27	0.003	91.7841	AB2
ZrCr2Co.8	1	45.3	100	2	127.201	AB2
ZrMo2	1	22	-78	0.4	105.215	AB2
ZrMoCr	1.3	27.6	25	0.2	79.2591	AB2
ZrV2	2.4	155	0	1000	625.1	AB2
CaNi4B	1.2	55.7	27	0.01	147.444	AB5
CaNi5	null	42	22	0.08	121.409	AB5
CaNi5	0.3	62	22	0.04	183.453	AB5
CaNi5	1.2	33.9	25	0.7	110.798	AB5
CaNi5	1.7	37.7	25	0.5	120.757	AB5
CaNi5	1.9	31.9	25	0.5	101.294	AB5
CaNi5	1.9	32.2	20	0.33	100.696	AB5
Ce.5La.5Ni2.5Cu2.5	1.1	22.9	23	2.2	83.9091	AB5
Ce.6La.4Ni5	1.5	22.3	25	28	102.49	AB5
Ce.8La.2Ni4.7Cu0.3	1.5	21	23	18	94.936	AB5
Ce.8La.2Ni5	1.5	23.8	23	30	108.635	AB5
Ce0.2Pr0.8Co5	0.6	39	20	0.23	120.907	AB5
Ce0.4Pr0.6Co5	0.6	38.5	20	1	131.399	AB5
Ce0.6Pr0.4Co5	0.6	38.5	20	1.26	133.318	AB5
Ce0.7La0.7Ni5	1.4	25	20	11	105.227	AB5
Ce0.8La0.2Ni5	1.5	20.8	60	74	98.1862	AB5
Ce0.8Pr0.2Co5	0.6	37	20	1.42	129.19	AB5
CeCo5	0.5	40	20	1.45	139.603	AB5
CeCo5	0.65	29	50	6	104.655	AB5
CeCo5	0.6	39	20	1.45	136.19	AB5
CeFe5	0.7	82	100	0.07	197.767	AB5
CeNi4.25Mn.75	1.4	24.7	23	1.1	84.237	AB5
CeNi4.5Al.5	1.4	21.6	23	9	91.2099	AB5
CeNi4.5Mn.5	1.2	25.4	23	7	101.962	AB5
CeNi5	1.4	14.2	25	50	80.1208	AB5
CeNi5	1.5	22.2	23	80	111.371	AB5
DyNi4.25Ga.75	0.8	30.1	20	6	117.602	AB5
DyNi4.5Al.5	1	27.3	20	20	118.039	AB5
DyNi4Al	0.8	35.4	20	0.6	116.579	AB5
ErNi3.5Al1.5	0.7	39.8	115	2.5	110.183	AB5
ErNi4.5Al.5	0.8	25.4	0	25	119.757	AB5
ErNi4Al	0.9	32.4	0	2.1	124.839	AB5
EuNi5	1.2	26	25	1.3	89.4259	AB5
GdNi4.5Al.5	0.9	32.7	20	7	127.755	AB5
GdNi4Al	0.9	41.5	20	0.2	128.28	AB5
HoNi4.5Al.5	0.9	24.1	0	22	113.934	AB5
HoNi4Al	0.9	35.9	60	4	119.314	AB5
LaNi3FeCu	1.1	37.2	22	0.33	116.9	AB5
LaNi4.25Al.75	1.13	44.1	40	0.054	116.669	AB5
LaNi4.25Co.5Sn.25	1.4	42.5	25	0.5	136.864	AB5
LaNi4.4B.6	0.62	33.5	25	0.3	102.423	AB5
LaNi4.4Zn.6	1.4	34.8	20	0.3	108.778	AB5
LaNi4.5Al.5	1.38	38.6	60	0.6	111.676	AB5
LaNi4.5Al.5	1.4	44.4	25	0.3	139	AB5
LaNi4.5Mn0.3Al0.3	1.3	39.3	35	0.2	114.239	AB5
LaNi4.5Si.5	1	36.5	25	0.5	116.73	AB5
LaNi4.65Mn0.2Al0.15	1.5	38.8	20	0.6	128.183	AB5
LaNi4.6Al.4	1.38	36.4	48	0.64	109.691	AB5
LaNi4.6Cu0.3Mn0.1	1.4	32	35	1	103.896	AB5
LaNi4.6Ga.4	null	35	20	0.3	109.461	AB5
LaNi4.6Ge.4	1.2	34.3	30	0.78	111.139	AB5
LaNi4.6Ge0.4	1.1	34	100	8	108.412	AB5
LaNi4.6In.4	1.2	39.8	20	0.05	110.972	AB5
LaNi4.6Mn.4	1.49	39.4	25	0.15	116.469	AB5
LaNi4.6Si.4	1	35.6	30	0.67	114.168	AB5
LaNi4.6Si0.4	1	34.2	100	12	112.314	AB5
LaNi4.6Sn.4	1.26	38.5	20	0.08	110.436	AB5
LaNi4.6Sn0.4	1.1	38.2	100	4	113.919	AB5
LaNi4.75Al0.25	1.2	33.7	35	1.2	110.929	AB5
LaNi4.7Al.3	1.37	29.7	50	1.2	93.4637	AB5
LaNi4.7Al.3	1.44	34	25	0.42	106.894	AB5
LaNi4.7Al0.3	1.3	34.9	20	0.7	116.152	AB5
LaNi4.7Mn0.3	1.4	36.2	20	0.9	122.675	AB5
LaNi4.7Si.3	1.1	33.8	25	1	113.423	AB5
LaNi4.85In.15	null	31.8	30	0.78	102.888	AB5
LaNi4.8Sn.2	1.4	29.4	25	0.8	96.8056	AB5
LaNi4.8Sn.2	1.4	32.8	25	0.47	103.8	AB5
LaNi4.8Sn0.2	1.2	33.5	35	1.1	109.557	AB5
LaNi4.93In.07	null	35.2	30	1.37	118.785	AB5
LaNi4.95Sn.05	1.3	32	100	14	107.695	AB5
LaNi4.9Al0.1	1.4	33	35	1.5	110.508	AB5
LaNi4.9Mn0.1	1.4	29	35	1.5	97.5212	AB5
LaNi4.9Sn0.1	1.3	32	35	2.1	110.054	AB5
LaNi4Al0.5Cu0.5	1.4	40	22	0.09	115.607	AB5
LaNi4Cr	0.54	34	25	0.04	87.3773	AB5
LaNi4Cu	1	33.9	60	4	113.308	AB5
LaNi4Fe	0.8	34.5	40	0.11	91.9033	AB5
LaNi4Fe0.5Cu0.5	1.3	36.1	22	0.48	116.281	AB5
La.8Ce.2Ni4.25Co.5Sn.25	1.2	38.2	25	0.8	126.336	AB5
La.8Ce.2Ni4.8Sn.25	1.2	32.4	25	1.1	109.516	AB5
La0.13Ce0.35Pr0.52Co5	0.8	40	50	3.6	134.471	AB5
La0.1Ce0.9Co5	0.6	41	20	0.84	138.485	AB5
La0.2Ce0.8Co5	0.6	44	20	0.72	147.444	AB5
La0.2Pr0.8Co5	0.7	38	20	0.23	117.495	AB5
La0.4Ce0.6Co5	0.6	38	20	0.65	126.117	AB5
La0.4Pr0.6Co5	0.9	29	20	17	122.492	AB5
La0.65Ce0.28Pr0.07Co5	1	47	50	1.1	146.302	AB5
La0.66Ce0.2Pr0.14Co5	1	41	50	0.9	126.06	AB5
La0.6Pr0.4Co5	0.9	43	20	0.17	132.05	AB5
La0.75Ce0.25Ni4Cu0.8Al0.2	1.4	33.5	22	0.7	110.599	AB5
La0.75Ce0.25Ni4Cu0.9Al0.1	1.4	32.9	22	1	111.525	AB5
La0.75Ce0.25Ni4Cu0.9Ti0.1	1.4	38.4	22	1.1	130.961	AB5
La0.75Pr0.25Ni4.5Cu0.3Al0.2	1.4	34.2	22	0.8	114.08	AB5
La0.7Ce0.3Co5	0.7	42	20	0.17	128.637	AB5
La0.8Ce0.2Co5	0.8	34	20	0.18	101.808	AB5
La0.8Pr0.2Co5	0.9	38	20	0.11	111.372	AB5
LaCo5	0.8	42.4	null	null		AB5
LaCo5	0.99	40	50	0.2	110.481	AB5
LaCo5	1	42.3	30	0.06	116.253	AB5
LaCu5	0.8	42.7	101	5	127.529	AB5
LaNi2Cu3	0.9	32	35	1.1	104.687	AB5
LaNi2FeCu2	1.1	36.9	22	0.55	120.123	AB5
LaNi3.92Al.98	1.1	42	250	5	93.6643	AB5
LaNi3Cr0.5Cu1.5	1.1	35.5	22	0.62	116.371	AB5
LaNi3Cu2	1.1	33	35	1.8	112.021	AB5
LaNi5	1.4	29.1	20	1.7	103.722	AB5
LaNi5	1.4	29.5	21	1.5	103.705	AB5
LaNi5	null	37.7	0	0.4	130.49	AB5
LaNi5	1.4	29.7	0	0.5	103.038	AB5
LaNi5	1.5	31.8	15	1	110.417	AB5
LaNi5	1.5	30.2	25	1.7	105.746	AB5
LaNi5	1.5	30.8	25	1.8	108.234	AB5
LaNi5	1.5	28.5	-55	0.06	107.383	AB5
LaNi5	1.5	30.1	21	2.4	109.647	AB5
LaNi5	1.8	30.1	-40	0.1	110.073	AB5
LaNi5.2Mn0.05Al0.05	0.8	26.8	20	1.3	93.6452	AB5
LaNi5.5Mn0.1Al0.05	1	26	20	1.6	92.6382	AB5
LaNi6.37Mn0.33	0.8	23.2	20	2	84.934	AB5
LaNiCo4	1	45	40	0.15	128.024	AB5
NdCo5	0.62	42.7	22	0.7	141.785	AB5
NdNi4.6Sn.4	1	26.4	20	1.4	92.8951	AB5
NdNi4.8Sn.2	1.1	25.7	20	6.5	103.249	AB5
NdNi4.9Sn.1	1.2	27.9	20	10	114.333	AB5
NdNi5	0.9	27.9	20	16	118.234	AB5
NdNi5	1.03	28	null	null		AB5
NdNi5	1.27	21.6	20	20	98.5847	AB5
NdNi5	1.36	26.3	23	13	110.14	AB5
NdNi5	1.33	27.8	30	18	115.739	AB5
PrCo5	0.7	34.3	100	13.5	113.559	AB5
PrCo5	0.8	40	20	0.49	130.598	AB5
PrNi2.5Cu2.5	0.8	19.3	23	25	91.9194	AB5
PrNi4.5Fe.5	1.26	20.5	23	6	84.1284	AB5
PrNi5	1.58	30.5	23	8	120.3	AB5
PrNi5	1.4	26.4	20	20	114.967	AB5
PrNi5	1.4	29	20	10	118.088	AB5
SmCo5	0.64	34.9	20	3.2	128.767	AB5
SmCo5	0.7	30	25	5	114.029	AB5
TbNi4.5Al.5	1.1	26.9	20	10	110.92	AB5
TbNi4Al	0.9	33.7	20	0.9	114.143	AB5
YCo5	0.73	32.2	31	28	133.578	AB5
YCo5	0.9	28.5	0	10	123.507	AB5
YNi4.25Al.75	1.1	24.3	21	6	97.5247	AB5
YNi4.5Al.5	1.1	22.4	20	20	101.315	AB5
YNi4Al	1	40.8	60	3	131.641	AB5
Ce3Al	1.9	111.8	null	null		MIC
Ce7Ni3	1.6	152	null	null		MIC
CeCo3	1.6	38.1	50	0.2	104.598	MIC
CeCo3	1	38.1	79	0.3	98.2457	MIC
CePtAl	0.3	24	22	1.2	82.8692	MIC
Dy2Co7	1.1	35.8	50	2	116.589	MIC
Dy2Co7	1.1	34.2	50	2	111.635	MIC
DyCo3	1.3	42	100	3	121.719	MIC
DyCo3	1.4	42.7	50	0.3	122.205	MIC
DyFe3	1	47.1	150	0.4	103.742	MIC
DyFe3	1.1	45.7	20	0.001	98.6383	MIC
Er2Co7	1.3	29.6	50	8	108.9	MIC
Er6Fe23	0.8	19	0	2	75.3502	MIC
Er6Mn23	0.5	32.3	null	null		MIC
ErCo3	1.2	38	100	10	120.988	MIC
ErCo3	1.3	39.8	50	0.2	109.861	MIC
ErFe3	0.8	42.9	150	1.15	102.578	MIC
ErNi3	1.5	23.8	-40	1.2	103.659	MIC
Gd2Co7	0.9	40	100	6	122.11	MIC
Gd3Ni6Al2	1	33.6	300	5.6	72.9377	MIC
GdCo3	1.3	42.6	20	0.015	110.535	MIC
GdCo3	1.4	45	150	3	115.501	MIC
GdFe3	1	50.4	150	0.18	104.916	MIC
Ho2Co7	1.1	36.7	50	5	126.981	MIC
Ho6Fe23	0.8	24.3	0	0.3	79.018	MIC
Ho6Mn23	0.5	34.6	null	null		MIC
HoCo3	1.2	36	100	6	111.386	MIC
HoFe3	1	44.6	150	0.63	101.602	MIC
La.5Ca.5Ni3	1.6	43.5	20	0.6	144.224	MIC
La.5Ca1.5MgNi9	1.9	35.4	20	0.7	117.859	MIC
La7Ni3	1.7	152	null	null		MIC
LaCaMgNi6Al.3	1.9	30	20	0.4	94.7839	MIC
LaCaMgNi6Al3	1.8	30	20	0.4	94.7839	MIC
LaCaMgNi6Mn.3	1.8	32.3	20	1	110.239	MIC
LaCaMgNi6Mn3	1.8	32.3	20	1.3	112.417	MIC
LaCaMgNi9	1.8	33	20	2.5	120.233	MIC
LaCaMgNi9	1.8	33	20	2.5	120.233	MIC
LaMg2Cu2	2.4	64.2	170	0.4	137.316	MIC
Lu6Fe23	0.6	39.7	0	2	151.174	MIC
LuCo3	1	32	20	5.9	123.947	MIC
Mg51Zn20	3.6	80.9	330	8	151.422	MIC
Mg6Pd	0.9	80.3	160	0.014	150.02	MIC
Nd2Co7	1.2	56.7	125	0.9	141.588	MIC
NdCo3	1.3	54.5	20	0.29	175.732	MIC
Pr2Co7	0.7	33.3	100	10	108.388	MIC
Pr2Co7	1.1	54.6	150	2	134.831	MIC
PrCo3	1.3	54.2	100	0.02	112.839	MIC
Sm2Fe17	0.4	75	null	null		MIC
SmCo3	0.6	59.4	69	0.2	160.326	MIC
Tb2Co7	1.1	40.4	50	2	130.831	MIC
TbCo3	1.3	44	100	1.5	121.328	MIC
TbCo3	1.4	46.9	75	0.6	130.53	MIC
TbFe3	1.1	48	150	0.23	101.277	MIC
ThNiAl	0.9	47	40	0.007	108.976	MIC
Ti3Al	2.9	47	50	0.8	143.659	MIC
Ti3Sb	0.8	110	null	null		MIC
Ti3Sn	0.34	101	null	null		MIC
Ti4Cu2O	0.8	31	null	null		MIC
UNiAl	0.8	48	null	null		MIC
Y2Co7	1.3	38	20	0.25	118.187	MIC
Y4.3Sc.7Si2.6Ge.4	0.5	39.4	426	1.5	59.7316	MIC
Y5Si3	0.4	53.3	398	0.3	69.4407	MIC
Y5Si3C.3	1.1	44.7	null	null		MIC
Y5Si3C.5	1.4	39.5	null	null		MIC
YCo3	1.5	44	75	0.45	119.809	MIC
Zr.1Tb.9Fe1.5Co1.5	1.1	21	75	0.5	54.5917	MIC
Zr.2Tb.8Fe1.5Co1.5	0.8	20	75	1	57.4713	MIC
Zr2Ni5	0.5	35	60	0.8	103.253	MIC
Zr7Ni10	1.4	47	60	0.25	129.635	MIC
(La.65Ca.35)(Mg1.32Ca.68)Ni9	null	26.8	10	2	100.453	MIC
(Y.5Ca.5)(MgCa)Ni9	2	25.8	-10	2	103.852	MIC
CaNi3	2	35	20	0.4	111.849	MIC
CaNi3	2.1	58	null	null		MIC
CaTiMgNi9	1.9	33.4	20	1	113.993	MIC
CaTiMgNi9	1.9	33.4	20	1.1	114.784	MIC
Ce2Co7	0.9	43.3	100	0.9	115.211	MIC
Pd.95Co.05	0.6	38.2	81	0.6	103.67	SS
Pd.95Cr.05	0.6	29.6	30	0.26	86.5091	SS
Pd.95Ni.025Rh.025	0.7	32.6	50	0.32	91.4715	SS
Pd.95Ni.05	null	31.6	50	1.4	100.626	SS
Pd.95Pt.05	0.6	29	25	0.3	87.3225	SS
Pd.95Pt.05	0.6	33	30	0.17	94.2036	SS
Pd.95Rh.05	0.7	28	25	0.21	81.0064	SS
Pd.95Rh.05	0.7	34.2	30	0.13	95.9375	SS
Pd.95Sb.05	0.5	34.6	100	0.07	70.6895	SS
Pd.95Sc.05	0.5	37.4	50	0.04	89.0728	SS
Pd.96Pt.04	0.5	37.4	80	0.4	98.3438	SS
Pd.972Ir.028	0.5	30.7	25	0.1	83.9087	SS
Pd.975Mo.025	0.5	30.8	30	0.16	86.4397	SS
Pd.975Rh.025	0.7	36	30	0.056	94.8879	SS
Pd.98V.02	0.5	30.8	25	0.1	84.2442	SS
Pd.9Co.1	0.5	29.8	80	4	95.9255	SS
Pd.9Ni.05Rh.05	0.6	28.4	30	0.7	90.769	SS
Pd.9Pt.1	0.4	27.4	25	2	97.6994	SS
Pd.9Rh.1	0.6	29.2	30	0.58	91.8484	SS
Pd.9Rh.1	0.7	24	25	1.03	80.7823	SS
Pd.9Rh.1	0.7	32.4	50	0.6	96.0697	SS
Ti.23Mn.36V.41	2.8	34	40	4	120.132	SS
(V.59Ti.41).74Mn.26	null	52.7	25	0.03	147.741	SS
(V.63Ti.37).8Mn.1Fe.1	null	44.7	25	0.03	120.896	SS
(V.85Ti.15).92Mn.08	null	50.6	25	0.06	146.447	SS
(V.89Ti.11).95Fe.05	3.3	42.9	40	4.5	149.545	SS
(V.8Ti.2).86Mn.14	null	48.6	25	0.04	136.371	SS
(V.8Ti.2).88Mn.08Fe.04	null	48.5	25	0.08	141.788	SS
(V.8Ti.2).9Al.05Fe.05	null	46.8	null	null		SS
(V.9Ti.1).95Fe.05	3.7	43.2	80	9.3	140.889	SS
(V.9Ti.1).95Ge.05	null	47.3	null	null		SS
(V.9Ti.1).9Al.05Fe.05	null	42.8	null	null		SS
Nb.95Cr.05	0.9	47.2	77	0.26	123.676	SS
Nb.97Cr.03	0.9	47.2	77	0.45	128.23	SS
Ni.8Cu.2	null	5.1	25	3800	85.529	SS
Pd.75Rh.25	0.8	25.4	0	5	106.399	SS
Pd.7Ag.3	0.3	46	50	0.002	90.8336	SS
Pd.825Ni.1Rh.075	0.7	21.4	30	6.3	85.9036	SS
Pd.85Rh.15	0.7	31	50	2.7	104.219	SS
Pd.88Pt.06Rh.06	0.5	24.8	0	0.3	80.8495	SS
Pd.8Rh.2	0.8	28.4	30	4.8	106.749	SS
Pd.90Pt.10	0.3	30.7	80	3	96.0873	SS
Pd.91Co.09	null	27.2	20	4	104.339	SS
Pd.91Ni.09	null	29.4	50	6.8	106.932	SS
Pd.925Rh.075	0.7	32.4	30	0.3	96.9377	SS
Pd.927Ir.073	0.1	17	25	0.6	52.8071	SS
Pd.92Pt.08	0.4	30.7	80	1.8	91.8475	SS
Pd.942Ir.058	0.4	25.9	25	0.35	78.1992	SS
Pd.952Ti.048	0.4	27.2	100	2.3	79.8354	SS
Pd.95Bi.05	0.4	37.8	100	0.16	86.1301	SS
Pd.95Co.05	null	31.8	50	1.8	103.331	SS
V.855Cr.145	2.3	29.7	50	50	124.42	SS
V.8Ti.2	3	48.1	80	2	142.014	SS
V.8Ti.2	3.4	60	110	1.8	161.537	SS
Zr.975Nb.025	2.2	219	800	0.2	190.742	SS
V0.85Ti0.1Fe0.05	1.5	42.9	100	53.14	147.989	AB2
Ti0.9Zr0.1Mn1.4Cr0.35V0.2Fe0.05	null	25.89	100	91.14	106.863	AB2
TiCr1.9	null	26.19	30	72.34	121.971	AB2
(Ti0.97Zr0.03)1.1Cr1.6Mn0.4	null	23.4	99	527.9	114.935	AB2
TiCr1.5Mn0.25Fe0.25	null	19.32	25	83.61	101.569	AB2
TiCr1.5Mn0.2Fe0.3	null	18.32	25	116.4	100.96	AB2
TiCrMn	null	19.6	25	126.8	105.965	AB2
(Ti0.8Zr0.2)1.1CrMn	null	28.3	100	75.6	111.773	AB2
TiFe	1.9	28.1	100	40.1	105.974	AB
TiMn1.5	1.9	28	100	81.3	111.572	AB2
TiCr1.75Al0.05	1.9	24	100	500.9	115.939	AB2
TiCr1.7Al0.2	null	28.1	100	600.8	128.441	AB2
TiCr1.6Mn0.2	null	28	100	659	128.94	AB2
TiCr0.95Mn0.95	null	22.8	100	646	114.834	AB2
TiCr1.75Ni0.1	null	20.5	100	577.2	107.733	AB2
TiCr1.7Ni0.3	null	21.7	100	343.5	106.642	AB2
TiCr1.9Mo0.01	null	24.8	100	269.8	112.949	AB2
Ti1.1CrMn	1.6	22.9	100	610.7	114.635	AB2
(Ti0.85Zr0.15)1.1CrMn	1.5	26.6	100	135.5	112.058	AB2
(Ti0.85Zr0.15)1.1Cr0.95Mo0.05Mn	null	26.2	100	223.9	115.154	AB2
(Ti0.85Zr0.15)1.1Cr0.9Mo0.1Mn	1.78	23.7	80	103.3	105.631	AB2
(Ti0.85Zr0.15)1.1Cr0.85Mo0.15Mn	1.67	21.7	80	114.7	100.834	AB2
(Ti0.85Zr0.15)1.1Cr0.98W0.02Mn	1.52	26.3	80	112.8	113.727	AB2
(Ti0.85Zr0.15)1.1Cr0.95W0.05Mn	1.43	24.3	80	128.3	109.13	AB2
(Ti0.85Zr0.15)1.1Cr0.9W0.1Mn	1.36	22.6	80	167.5	106.527	AB2
TiCr1.6Mn0.2Fe0.2	null	19.66	162	1000	102.53	AB2
TiCr1.58Mn0.2Fe0.2	null	19.9	159	1000	103.399	AB2
TiCr1.55Mn0.2Fe0.2	null	20.32	157	1000	104.59	AB2
TiCr1.5Mn0.2Fe0.2	null	20.78	164	1000	104.886	AB2
Ti0.9Zr0.2Mn1.8V0.2	null	26.01	120	38.9212	96.574	AB2
Ti0.9Zr0.2Mn1.6Ni0.2V0.2	null	31.7	120	56.0163	114.074	AB2
Ti0.9Zr0.15Mn1.6Cr0.2V0.2	null	15.37	120	26.4024	66.2791	AB2
Ti0.9Zr0.2Mn1.4Cr0.4V0.2	null	26.7	120	30.0341	96.1783	AB2
Ti0.9Zr0.2Mn1.8(VFe)0.2	null	29.15	120	53.6818	107.233	AB2
Ti0.9Zr0.2Mn1.6Ni0.2(VFe)0.2	null	23.19	120	41.9995	90.0302	AB2
Ti0.9Zr0.15Mn1.6Cr0.2(VFe)0.2	null	29.98	120	88.3132	113.476	AB2
Ti0.9Zr0.2Mn1.4Cr0.4(VFe)0.2	null	25.49	120	41.2476	95.7327	AB2
Ti0.97Zr0.019V0.439Fe0.097Cr0.045Al0.026Mn1.5	null	25.4	100	129.41	108.459	AB2
Ti0.98Zr0.02V0.43Fe0.09Cr0.05Mn1.5	null	27.4	100	103.471	111.965	AB2
Ti0.98Zr0.02V0.41Fe0.08Cr0.05Mn1.46	null	29.2	100	175.153	121.159	AB2
Ti0.95Zr0.05V0.43Fe0.08Al0.01Mn1.48	null	29.4	100	28.0248	106.485	AB2
Ti0.955Zr0.045V0.43Fe0.12Al0.03Mn1.52	null	28.7	100	122.686	116.864	AB2
TiCr1.78	null	28.4	100	653.264	129.94	AB2
TiCr1.4Mn0.4	null	28.3	100	369.747	124.948	AB2
TiCr1.2Mn0.6	null	24.4	100	241.294	110.949	AB2
TiCrMn0.8	null	22.4	100	223.411	104.948	AB2
CaNi5	null	35.1	120	15.0115	111.796	AB5
Ca0.95Zr0.05Ni5	null	33.5	120	16.2707	108.393	AB5
CaNi4.9Cr0.1	null	37.2	120	17.6762	118.496	AB5
Ca0.95Zr0.05Ni4.9Cr0.1	null	31.6	120	34.4337	109.781	AB5
