# Supplementary material for: A simple constrained machine learning model for predicting high-pressure-hydrogen-compressor materials
Source: Royal Society of Chemistry journal article supplement (doi:10.1039/c8me00005k), 2018-01-01
Supplement: c8me00005k2.xlsx [file c8me00005k2.xlsx]

## Sheet: Sheet1
pred #	name	measured	predicted	cost	AB	AB2	AB5	Laves
311	Ti0.3Mn0.2Fe0.5	NaN	21.7974	1.46868	TRUE	FALSE	FALSE	TRUE
305	Ti0.25Mn0.25Fe0.5	NaN	21.8088	1.38673	TRUE	FALSE	FALSE	TRUE
299	Ti0.2Mn0.3Fe0.5	NaN	21.9364	1.30584	TRUE	FALSE	FALSE	TRUE
5767	Ti0.05Mn0.45Cr0.05Fe0.45	NaN	22.0777	1.46153	TRUE	FALSE	FALSE	TRUE
5695	Ti0.1Mn0.35Cr0.05Fe0.5	NaN	22.1474	1.45027	TRUE	FALSE	TRUE	TRUE
5555	Ti0.2Mn0.1Cr0.05Fe0.65	NaN	22.4611	1.33464	FALSE	FALSE	TRUE	TRUE
293	Ti0.15Mn0.35Fe0.5	NaN	22.6983	1.22601	TRUE	FALSE	FALSE	TRUE
4798	Ti0.15Mn0.05Cr0.1Fe0.7	NaN	24.1237	1.46758	FALSE	FALSE	TRUE	TRUE
389	Ti0.1Mn0.5Fe0.4	NaN	24.1305	1.33009	TRUE	FALSE	FALSE	TRUE
5511	Ti0.15Mn0.1Cr0.05Fe0.7	NaN	24.2504	1.16269	FALSE	FALSE	TRUE	TRUE
5636	Ti0.1Mn0.3Cr0.05Fe0.55	NaN	24.3147	1.35856	FALSE	FALSE	TRUE	TRUE
5730	Ti0.25Mn0.2Al0.05Fe0.5	NaN	24.3996	1.38093	TRUE	FALSE	FALSE	TRUE
329	Ti0.05Mn0.5Fe0.45	NaN	24.4579	1.16014	TRUE	FALSE	FALSE	TRUE
5718	Ti0.2Mn0.25Al0.05Fe0.5	NaN	24.5386	1.29794	TRUE	FALSE	FALSE	TRUE
1543	Ti0.2Mn0.25Fe0.5Si0.05	NaN	24.5849	1.29418	TRUE	FALSE	FALSE	TRUE
5580	Ti0.1Mn0.25Cr0.05Fe0.6	NaN	24.7026	1.26701	FALSE	FALSE	TRUE	TRUE
5686	Ti0.05Mn0.4Cr0.05Fe0.5	NaN	24.7076	1.37032	TRUE	FALSE	FALSE	TRUE
285	Ti0.1Mn0.4Fe0.5	NaN	24.8859	1.14721	TRUE	FALSE	FALSE	TRUE
4764	Ti0.1Mn0.05Cr0.1Fe0.75	NaN	25.1535	1.29545	FALSE	FALSE	TRUE	TRUE
5908	Ti0.15Mn0.45Al0.05Fe0.35	NaN	25.1881	1.49987	TRUE	FALSE	FALSE	TRUE
749	Mn0.5Cr0.05Fe0.45	NaN	25.2126	1.38195	TRUE	FALSE	FALSE	TRUE
5897	Ti0.1Mn0.5Al0.05Fe0.35	NaN	25.3302	1.41698	TRUE	FALSE	TRUE	TRUE
5838	Ti0.1Mn0.45Al0.05Fe0.4	NaN	25.4022	1.32291	TRUE	FALSE	TRUE	TRUE
5537	Ti0.1Mn0.2Cr0.05Fe0.65	NaN	25.4257	1.1756	FALSE	FALSE	TRUE	TRUE
5798	Ti0.25Mn0.25Al0.05Fe0.45	NaN	25.4558	1.4768	TRUE	FALSE	FALSE	TRUE
2500	Ti0.15Mn0.45Fe0.35Si0.05	NaN	25.4692	1.49593	TRUE	FALSE	FALSE	TRUE
1557	Ti0.25Mn0.2Zn0.05Fe0.5	NaN	25.4692	1.47016	TRUE	FALSE	FALSE	TRUE
4851	Ti0.05Mn0.25Cr0.1Fe0.6	NaN	25.4697	1.4899	FALSE	FALSE	TRUE	TRUE
1606	Ti0.25Mn0.2Fe0.5Si0.05	NaN	25.4856	1.37707	TRUE	FALSE	FALSE	TRUE
4990	Ti0.15Mn0.25Al0.1Fe0.5	NaN	25.5014	1.20555	TRUE	FALSE	FALSE	TRUE
5792	Ti0.2Mn0.3Al0.05Fe0.45	NaN	25.5674	1.39309	TRUE	FALSE	FALSE	TRUE
5766	Ti0.05Mn0.45Al0.05Fe0.45	NaN	25.5822	1.14858	TRUE	FALSE	FALSE	TRUE
5477	Ti0.1Mn0.1Cr0.05Fe0.75	NaN	25.6231	0.993251	FALSE	FALSE	TRUE	TRUE
5499	Ti0.1Mn0.15Cr0.05Fe0.7	NaN	25.661	1.08435	FALSE	FALSE	TRUE	TRUE
1760	Mg0.05Ti0.25Mn0.2Fe0.5	NaN	25.75	1.3973	TRUE	FALSE	FALSE	TRUE
2203	Ti0.2Mn0.35Fe0.4Si0.05	NaN	25.7897	1.48445	FALSE	TRUE	FALSE	TRUE
1595	Ti0.2Mn0.2Fe0.5Si0.1	NaN	25.8146	1.28192	TRUE	FALSE	FALSE	TRUE
1884	Ti0.2Mn0.3Fe0.45Si0.05	NaN	25.8245	1.38923	TRUE	FALSE	FALSE	TRUE
5124	Ti0.1Mn0.4Al0.1Fe0.4	NaN	25.8275	1.31535	TRUE	FALSE	FALSE	TRUE
2536	Ti0.15Mn0.4Fe0.35Si0.1	NaN	25.8496	1.48897	TRUE	FALSE	FALSE	TRUE
5743	Ti0.3Mn0.15Al0.05Fe0.5	NaN	25.864	1.46506	TRUE	FALSE	FALSE	TRUE
747	Mn0.45Cr0.05Fe0.5	NaN	25.882	1.2914	TRUE	FALSE	FALSE	TRUE
1527	Ti0.15Mn0.25Fe0.5Si0.1	NaN	25.9183	1.1981	TRUE	FALSE	FALSE	TRUE
5785	Ti0.15Mn0.35Al0.05Fe0.45	NaN	25.9208	1.3105	TRUE	FALSE	FALSE	TRUE
4811	Ti0.05Mn0.2Cr0.1Fe0.65	NaN	25.9455	1.39865	FALSE	FALSE	TRUE	TRUE
2146	Ti0.1Mn0.4Fe0.4Si0.1	NaN	25.9549	1.3077	TRUE	FALSE	FALSE	TRUE
390	Mn0.5Zn0.1Fe0.4	NaN	26.0214	1.33724	TRUE	FALSE	FALSE	TRUE
5704	Ti0.15Mn0.3Al0.05Fe0.5	NaN	26.0323	1.21605	TRUE	FALSE	FALSE	TRUE
5177	Ti0.05Mn0.5Al0.1Fe0.35	NaN	26.0928	1.32799	TRUE	FALSE	TRUE	TRUE
5005	Ti0.2Mn0.2Al0.1Fe0.5	NaN	26.1306	1.2896	TRUE	FALSE	FALSE	TRUE
5139	Ti0.2Mn0.3Al0.1Fe0.4	NaN	26.1488	1.48526	TRUE	FALSE	FALSE	TRUE
658	Mn0.5Al0.15Fe0.35	NaN	26.1763	1.23536	TRUE	FALSE	FALSE	TRUE
1486	Ti0.15Mn0.3Fe0.5Si0.05	NaN	26.2175	1.21241	TRUE	FALSE	FALSE	TRUE
5461	Ti0.1Mn0.05Cr0.05Fe0.8	NaN	26.2306	0.902301	FALSE	FALSE	TRUE	TRUE
1499	Ti0.2Mn0.25Zn0.05Fe0.5	NaN	26.2322	1.38951	TRUE	FALSE	FALSE	TRUE
5133	Ti0.15Mn0.35Al0.1Fe0.4	NaN	26.2585	1.39972	TRUE	FALSE	FALSE	TRUE
1672	Ti0.3Mn0.15Fe0.5Si0.05	NaN	26.3306	1.46108	TRUE	FALSE	FALSE	TRUE
2114	Ti0.05Mn0.45Fe0.4Si0.1	NaN	26.3665	1.2247	TRUE	FALSE	TRUE	TRUE
5613	Ti0.25Mn0.1Al0.05Fe0.6	NaN	26.3667	1.18969	FALSE	FALSE	TRUE	TRUE
33	Mn0.5Fe0.5	NaN	26.3753	0.992632	TRUE	FALSE	FALSE	TRUE
1569	Ti0.2Mn0.2Zn0.1Fe0.5	NaN	26.3947	1.47159	TRUE	FALSE	FALSE	TRUE
2192	Ti0.15Mn0.35Fe0.4Si0.1	NaN	26.4263	1.39184	TRUE	FALSE	FALSE	TRUE
1474	Ti0.1Mn0.3Fe0.5Si0.1	NaN	26.4384	1.11542	TRUE	FALSE	FALSE	TRUE
4975	Ti0.1Mn0.3Al0.1Fe0.5	NaN	26.4474	1.12264	TRUE	FALSE	FALSE	TRUE
5829	Ti0.05Mn0.5Al0.05Fe0.4	NaN	26.4762	1.2418	TRUE	FALSE	FALSE	TRUE
1930	Ti0.25Mn0.25Fe0.45Si0.05	NaN	26.4836	1.47283	TRUE	FALSE	FALSE	TRUE
4757	Ti0.05Mn0.1Cr0.1Fe0.75	NaN	26.5417	1.21662	FALSE	FALSE	TRUE	TRUE
5195	Ti0.15Mn0.4Al0.1Fe0.35	NaN	26.5474	1.49706	TRUE	FALSE	FALSE	TRUE
1698	Mg0.1Ti0.15Mn0.25Fe0.5	NaN	26.5694	1.23789	TRUE	FALSE	FALSE	TRUE
2118	Ti0.1Mn0.45Zn0.05Fe0.4	NaN	26.5797	1.41259	TRUE	FALSE	TRUE	TRUE
2449	Ti0.05Mn0.5Fe0.35Si0.1	NaN	26.6055	1.32036	TRUE	FALSE	TRUE	TRUE
2462	Ti0.1Mn0.5Fe0.35Si0.05	NaN	26.6111	1.41314	TRUE	FALSE	TRUE	TRUE
294	Mn0.35Zn0.15Fe0.5	NaN	26.6362	1.24142	TRUE	FALSE	FALSE	TRUE
4484	Ti0.1Mn0.4Al0.15Fe0.35	NaN	26.6387	1.40664	TRUE	FALSE	FALSE	TRUE
4775	Ti0.05Mn0.15Cr0.1Fe0.7	NaN	26.6984	1.30756	FALSE	FALSE	TRUE	TRUE
2126	Ti0.1Mn0.45Fe0.4Si0.05	NaN	26.6985	1.31918	TRUE	FALSE	TRUE	TRUE
1153	Ti0.25Mn0.1Fe0.6Si0.05	NaN	26.7147	1.18603	FALSE	FALSE	TRUE	TRUE
280	Ti0.05Mn0.45Fe0.5	NaN	26.7344	1.06943	TRUE	FALSE	FALSE	TRUE
473	Mg0.15Mn0.5Fe0.35	NaN	26.7544	1.28469	TRUE	FALSE	FALSE	TRUE
1840	Ti0.15Mn0.35Fe0.45Si0.05	NaN	26.7591	1.30675	TRUE	FALSE	FALSE	TRUE
1754	Mg0.05Ti0.2Mn0.25Fe0.5	NaN	26.7781	1.31398	TRUE	FALSE	FALSE	TRUE
5115	Ti0.05Mn0.45Al0.1Fe0.4	NaN	26.8155	1.23211	TRUE	FALSE	TRUE	TRUE
1780	Ti0.05Mn0.45Fe0.45Si0.05	NaN	26.8648	1.14505	TRUE	FALSE	FALSE	TRUE
5694	Ti0.1Mn0.35Al0.05Fe0.5	NaN	26.9093	1.13525	TRUE	FALSE	TRUE	TRUE
4538	Ti0.05Mn0.5Al0.15Fe0.3	NaN	26.9109	1.41909	TRUE	FALSE	FALSE	TRUE
4473	Ti0.05Mn0.45Al0.15Fe0.35	NaN	26.9834	1.3204	TRUE	FALSE	FALSE	TRUE
2082	Mg0.05Ti0.25Mn0.25Fe0.45	NaN	26.9851	1.49343	TRUE	FALSE	FALSE	TRUE
5934	Mg0.1Mn0.5Al0.05Fe0.35	NaN	26.9863	1.26816	TRUE	FALSE	TRUE	TRUE
5019	Ti0.25Mn0.15Al0.1Fe0.5	NaN	27.0304	1.37482	TRUE	FALSE	FALSE	TRUE
5668	Ti0.3Mn0.1Al0.05Fe0.55	NaN	27.0346	1.36863	FALSE	FALSE	TRUE	TRUE
5112	Mn0.45Al0.1Fe0.4Si0.05	NaN	27.0415	1.13392	TRUE	FALSE	TRUE	TRUE
1515	Ti0.15Mn0.25Zn0.1Fe0.5	NaN	27.0725	1.39221	TRUE	FALSE	FALSE	TRUE
1783	Ti0.05Mn0.45Zn0.05Fe0.45	NaN	27.1089	1.24364	TRUE	FALSE	FALSE	TRUE
5763	Mn0.45Al0.05Fe0.45Si0.05	NaN	27.13	1.05151	TRUE	FALSE	FALSE	TRUE
5776	Ti0.1Mn0.4Al0.05Fe0.45	NaN	27.1882	1.229	TRUE	FALSE	TRUE	TRUE
1447	Ti0.1Mn0.35Fe0.5Si0.05	NaN	27.2239	1.13172	TRUE	FALSE	TRUE	TRUE
2238	Ti0.2Mn0.3Fe0.4Si0.1	NaN	27.2247	1.47715	TRUE	FALSE	FALSE	TRUE
2519	Ti0.1Mn0.4Fe0.35Si0.15	NaN	27.235	1.39456	TRUE	FALSE	FALSE	TRUE
5227	Mg0.05Mn0.5Al0.1Fe0.35	NaN	27.2426	1.25172	TRUE	FALSE	TRUE	TRUE
5835	Mn0.45Al0.05Fe0.4Si0.1	NaN	27.2551	1.13024	TRUE	FALSE	TRUE	TRUE
5899	Mn0.5Al0.05Zn0.1Fe0.35	NaN	27.3236	1.42154	TRUE	FALSE	TRUE	TRUE
1706	Mg0.1Ti0.2Mn0.2Fe0.5	NaN	27.3376	1.32261	TRUE	FALSE	FALSE	TRUE
2381	Mg0.1Ti0.1Mn0.4Fe0.4	NaN	27.3796	1.34809	TRUE	FALSE	FALSE	TRUE
1851	Ti0.2Mn0.3Zn0.05Fe0.45	NaN	27.3811	1.48138	TRUE	FALSE	FALSE	TRUE
2066	Mg0.05Ti0.05Mn0.45Fe0.45	NaN	27.3908	1.16394	TRUE	FALSE	FALSE	TRUE
5441	Ti0.2Al0.1Cr0.05Fe0.65	NaN	27.4029	1.31997	FALSE	FALSE	TRUE	TRUE
2411	Mg0.05Ti0.1Mn0.45Fe0.4	NaN	27.408	1.33883	TRUE	FALSE	TRUE	TRUE
2103	Ti0.05Mn0.5Fe0.4Si0.05	NaN	27.4083	1.23817	TRUE	FALSE	FALSE	TRUE
704	Mn0.5Al0.1Fe0.4	NaN	27.4101	1.15	TRUE	FALSE	FALSE	TRUE
426	Mg0.1Mn0.5Fe0.4	NaN	27.4171	1.18146	TRUE	FALSE	FALSE	TRUE
330	Mn0.5Zn0.05Fe0.45	NaN	27.421	1.1664	TRUE	FALSE	FALSE	TRUE
2764	Mg0.05Mn0.5Zn0.1Fe0.35	NaN	27.4314	1.43721	TRUE	FALSE	TRUE	TRUE
5826	Mn0.5Al0.05Fe0.4Si0.05	NaN	27.4449	1.1464	TRUE	FALSE	FALSE	TRUE
2179	Ti0.1Mn0.35Fe0.4Si0.15	NaN	27.4716	1.29561	TRUE	FALSE	FALSE	TRUE
1818	Ti0.15Mn0.35Zn0.05Fe0.45	NaN	27.4769	1.40112	TRUE	FALSE	FALSE	TRUE
5174	Mn0.5Al0.1Fe0.35Si0.05	NaN	27.4804	1.23156	TRUE	FALSE	TRUE	TRUE
5878	Mg0.1Mn0.45Al0.05Fe0.4	NaN	27.497	1.16986	TRUE	FALSE	TRUE	TRUE
2107	Ti0.05Mn0.5Zn0.05Fe0.4	NaN	27.5173	1.33372	TRUE	FALSE	FALSE	TRUE
4738	Mn0.3Al0.15Cr0.05Fe0.5	NaN	27.5294	1.26579	TRUE	FALSE	FALSE	TRUE
2149	Ti0.1Mn0.4Zn0.1Fe0.4	NaN	27.5318	1.49355	TRUE	FALSE	FALSE	TRUE
1463	Ti0.15Mn0.3Zn0.05Fe0.5	NaN	27.5364	1.3099	TRUE	FALSE	FALSE	TRUE
5764	Mn0.45Cr0.05Fe0.45Si0.05	NaN	27.5527	1.37246	TRUE	FALSE	FALSE	TRUE
5164	Mg0.1Mn0.4Al0.1Fe0.4	NaN	27.5638	1.15761	TRUE	FALSE	FALSE	TRUE
6107	Mn0.45Al0.05Cr0.05Fe0.45	NaN	27.5745	1.3762	TRUE	FALSE	FALSE	TRUE
5727	Mg0.2Mn0.25Cr0.05Fe0.5	NaN	27.5855	1.32435	TRUE	FALSE	FALSE	TRUE
2067	Mg0.05Mn0.45Zn0.05Fe0.45	NaN	27.5866	1.17033	TRUE	FALSE	FALSE	TRUE
2129	Ti0.05Mn0.45Zn0.1Fe0.4	NaN	27.5896	1.4149	TRUE	FALSE	TRUE	TRUE
2576	Ti0.15Mn0.35Fe0.35Si0.15	NaN	27.5975	1.48164	TRUE	FALSE	FALSE	TRUE
5821	Mg0.05Mn0.45Al0.05Fe0.45	NaN	27.6038	1.07044	TRUE	FALSE	FALSE	TRUE
4740	Mn0.35Al0.15Cr0.05Fe0.45	NaN	27.6113	1.36376	TRUE	FALSE	FALSE	TRUE
5836	Mn0.45Cr0.05Fe0.4Si0.1	NaN	27.6206	1.4578	TRUE	FALSE	TRUE	TRUE
5827	Mn0.5Cr0.05Fe0.4Si0.05	NaN	27.6215	1.46541	TRUE	FALSE	FALSE	TRUE
1663	Ti0.25Mn0.15Fe0.5Si0.1	NaN	27.6319	1.3669	TRUE	FALSE	FALSE	TRUE
5742	Mg0.15Mn0.3Cr0.05Fe0.5	NaN	27.6516	1.31537	TRUE	FALSE	FALSE	TRUE
1614	Mg0.15Mn0.3Fe0.5Si0.05	NaN	27.6546	0.968506	TRUE	FALSE	FALSE	TRUE
2406	Mg0.05Mn0.5Zn0.05Fe0.4	NaN	27.6597	1.26229	TRUE	FALSE	FALSE	TRUE
5702	Mn0.3Cr0.05Fe0.5Si0.15	NaN	27.6797	1.25432	TRUE	FALSE	FALSE	TRUE
2376	Mg0.1Mn0.45Zn0.05Fe0.4	NaN	27.6825	1.26912	TRUE	FALSE	TRUE	TRUE
4416	Ti0.1Mn0.35Al0.15Fe0.4	NaN	27.696	1.30736	TRUE	FALSE	FALSE	TRUE
1349	Ti0.3Mn0.1Zn0.05Fe0.55	NaN	27.7027	1.45881	FALSE	FALSE	TRUE	TRUE
2732	Mg0.1Mn0.5Zn0.05Fe0.35	NaN	27.7146	1.36392	TRUE	FALSE	TRUE	TRUE
5233	Ti0.05Mn0.55Al0.1Fe0.3	NaN	27.7294	1.42403	FALSE	FALSE	TRUE	TRUE
1801	Ti0.1Mn0.4Fe0.45Si0.05	NaN	27.73	1.22537	TRUE	FALSE	TRUE	TRUE
5769	Mn0.45Zn0.05Cr0.05Fe0.45	NaN	27.7314	1.46307	TRUE	FALSE	FALSE	TRUE
286	Mn0.4Zn0.1Fe0.5	NaN	27.7378	1.16002	TRUE	FALSE	FALSE	TRUE
4841	Ti0.2Mn0.05Al0.1Fe0.65	NaN	27.7384	0.997397	FALSE	FALSE	TRUE	TRUE
5031	Mg0.1Mn0.3Al0.1Fe0.5	NaN	27.7503	0.95603	TRUE	FALSE	FALSE	TRUE
4750	Ti0.05Mn0.05Cr0.1Fe0.8	NaN	27.7633	1.12582	FALSE	FALSE	TRUE	TRUE
521	Mg0.2Mn0.5Fe0.3	NaN	27.7705	1.39455	TRUE	FALSE	FALSE	TRUE
2375	Mg0.1Ti0.05Mn0.45Fe0.4	NaN	27.7706	1.26421	TRUE	FALSE	TRUE	TRUE
1435	Ti0.05Mn0.35Fe0.5Si0.1	NaN	27.7734	1.03386	TRUE	FALSE	TRUE	TRUE
2379	Mg0.1Mn0.4Fe0.4Si0.1	NaN	27.7941	1.14995	TRUE	FALSE	FALSE	TRUE
1116	Ti0.25Mn0.1Zn0.05Fe0.6	NaN	27.7952	1.28554	FALSE	FALSE	TRUE	TRUE
5822	Mg0.05Mn0.45Cr0.05Fe0.45	NaN	27.8023	1.39208	TRUE	FALSE	FALSE	TRUE
310	Mg0.2Mn0.3Fe0.5	NaN	27.817	0.988329	TRUE	FALSE	FALSE	TRUE
2465	Mn0.5Zn0.1Fe0.35Si0.05	NaN	27.8186	1.41783	TRUE	FALSE	TRUE	TRUE
1791	Ti0.05Mn0.4Fe0.45Si0.1	NaN	27.8367	1.12919	TRUE	FALSE	TRUE	TRUE
2763	Mg0.05Ti0.1Mn0.5Fe0.35	NaN	27.8381	1.43315	TRUE	FALSE	TRUE	TRUE
5741	Mg0.15Mn0.3Al0.05Fe0.5	NaN	27.872	0.972136	TRUE	FALSE	FALSE	TRUE
1794	Ti0.1Mn0.4Zn0.05Fe0.45	NaN	27.8908	1.32188	TRUE	FALSE	TRUE	TRUE
5880	Mg0.05Mn0.5Al0.05Fe0.4	NaN	27.8932	1.16569	TRUE	FALSE	FALSE	TRUE
2811	Ti0.05Mn0.5Fe0.3Si0.15	NaN	27.8944	1.40704	TRUE	FALSE	FALSE	TRUE
2731	Mg0.1Ti0.05Mn0.5Fe0.35	NaN	27.9016	1.36061	TRUE	FALSE	TRUE	TRUE
5541	Ti0.2Zn0.1Cr0.05Fe0.65	NaN	27.9158	1.49988	FALSE	FALSE	TRUE	TRUE
386	Mn0.5Fe0.4Si0.1	NaN	27.9258	1.14281	TRUE	FALSE	FALSE	TRUE
2729	Mg0.1Mn0.5Fe0.35Si0.05	NaN	27.9412	1.26431	TRUE	FALSE	TRUE	TRUE
2412	Mg0.05Mn0.45Zn0.1Fe0.4	NaN	27.946	1.3459	TRUE	FALSE	TRUE	TRUE
4297	Ti0.15Mn0.2Al0.15Fe0.5	NaN	27.9506	1.19446	TRUE	FALSE	FALSE	TRUE
5753	Mg0.1Mn0.35Cr0.05Fe0.5	NaN	27.9655	1.30691	TRUE	FALSE	TRUE	TRUE
5768	Mn0.45Al0.05Zn0.05Fe0.45	NaN	27.9707	1.15519	TRUE	FALSE	FALSE	TRUE
5179	Mn0.5Al0.1Zn0.05Fe0.35	NaN	27.976	1.33183	TRUE	FALSE	TRUE	TRUE
1580	Ti0.15Mn0.2Fe0.5Si0.15	NaN	28.001	1.18302	TRUE	FALSE	FALSE	TRUE
1636	Mg0.15Ti0.15Mn0.2Fe0.5	NaN	28.0166	1.24438	TRUE	FALSE	FALSE	TRUE
1626	Mg0.15Ti0.1Mn0.25Fe0.5	NaN	28.0337	1.15822	TRUE	FALSE	FALSE	TRUE
1461	Mn0.3Zn0.05Fe0.5Si0.15	NaN	28.0421	1.02387	TRUE	FALSE	FALSE	TRUE
6108	Mn0.5Al0.05Cr0.05Fe0.4	NaN	28.0576	1.46926	TRUE	FALSE	FALSE	TRUE
5169	Mg0.05Mn0.45Al0.1Fe0.4	NaN	28.0603	1.15369	TRUE	FALSE	TRUE	TRUE
5894	Mn0.5Al0.05Fe0.35Si0.1	NaN	28.0796	1.22778	TRUE	FALSE	TRUE	TRUE
5456	Ti0.05Mn0.1Cr0.05Fe0.8	NaN	28.0868	0.82626	FALSE	FALSE	TRUE	TRUE
2451	Mn0.5Zn0.05Fe0.35Si0.1	NaN	28.0883	1.32432	TRUE	FALSE	TRUE	TRUE
5783	Mn0.35Cr0.05Fe0.45Si0.15	NaN	28.0894	1.35197	TRUE	FALSE	FALSE	TRUE
2815	Mn0.5Zn0.05Fe0.3Si0.15	NaN	28.0897	1.40963	TRUE	FALSE	FALSE	TRUE
1689	Mg0.1Ti0.1Mn0.3Fe0.5	NaN	28.0899	1.15433	TRUE	FALSE	FALSE	TRUE
1531	Na0.1Mn0.25Zn0.15Fe0.5	NaN	28.0936	1.21533	TRUE	FALSE	FALSE	TRUE
3089	Mg0.15Ti0.05Mn0.5Fe0.3	NaN	28.0999	1.47028	TRUE	FALSE	FALSE	TRUE
1438	Ti0.1Mn0.35Zn0.05Fe0.5	NaN	28.1029	1.23131	TRUE	FALSE	TRUE	TRUE
1766	Mg0.05Ti0.3Mn0.15Fe0.5	NaN	28.116	1.48175	TRUE	FALSE	FALSE	TRUE
5840	Mn0.45Al0.05Zn0.1Fe0.4	NaN	28.123	1.33047	TRUE	FALSE	TRUE	TRUE
5554	Ti0.2Mn0.1Al0.05Fe0.65	NaN	28.1284	1.01346	FALSE	FALSE	TRUE	TRUE
5448	Mn0.45Al0.1Cr0.05Fe0.4	NaN	28.1335	1.46568	TRUE	FALSE	TRUE	TRUE
958	Ti0.2Mn0.1Fe0.65Si0.05	NaN	28.1391	1.01002	FALSE	FALSE	TRUE	TRUE
2128	Mn0.45Zn0.1Fe0.4Si0.05	NaN	28.1482	1.32685	TRUE	FALSE	TRUE	TRUE
1510	Ti0.1Mn0.25Fe0.5Si0.15	NaN	28.1601	1.09826	TRUE	FALSE	FALSE	TRUE
2148	Mn0.4Zn0.1Fe0.4Si0.1	NaN	28.1648	1.31594	TRUE	FALSE	FALSE	TRUE
2405	Mg0.05Ti0.05Mn0.5Fe0.4	NaN	28.2009	1.25741	TRUE	FALSE	FALSE	TRUE
2387	Mg0.1Ti0.15Mn0.35Fe0.4	NaN	28.2134	1.43313	TRUE	FALSE	FALSE	TRUE
2788	Ti0.05Mn0.55Fe0.3Si0.1	NaN	28.2379	1.4162	FALSE	FALSE	TRUE	TRUE
5692	Mn0.35Cr0.05Fe0.5Si0.1	NaN	28.2534	1.26731	TRUE	FALSE	TRUE	TRUE
290	Mn0.35Fe0.5Si0.15	NaN	28.2542	0.932231	TRUE	FALSE	FALSE	TRUE
5774	Mn0.4Cr0.05Fe0.45Si0.1	NaN	28.2887	1.36248	TRUE	FALSE	TRUE	TRUE
1477	Mn0.3Zn0.1Fe0.5Si0.1	NaN	28.3103	1.12991	TRUE	FALSE	FALSE	TRUE
5811	Mg0.15Mn0.35Cr0.05Fe0.45	NaN	28.3139	1.41416	TRUE	FALSE	FALSE	TRUE
5752	Mg0.1Mn0.35Al0.05Fe0.5	NaN	28.3228	0.973793	TRUE	FALSE	TRUE	TRUE
5280	Mg0.1Mn0.5Al0.1Fe0.3	NaN	28.3454	1.35993	TRUE	FALSE	FALSE	TRUE
2373	Mg0.1Mn0.45Fe0.4Si0.05	NaN	28.3611	1.16612	TRUE	FALSE	TRUE	TRUE
4491	Ti0.15Mn0.35Al0.15Fe0.35	NaN	28.3721	1.4941	TRUE	FALSE	FALSE	TRUE
5831	Mn0.5Al0.05Zn0.05Fe0.4	NaN	28.3812	1.24692	TRUE	FALSE	FALSE	TRUE
301	Mn0.3Zn0.2Fe0.5	NaN	28.3869	1.32133	TRUE	FALSE	FALSE	TRUE
5445	Mn0.35Al0.1Cr0.05Fe0.5	NaN	28.4036	1.27478	TRUE	FALSE	TRUE	TRUE
1782	Mn0.45Zn0.05Fe0.45Si0.05	NaN	28.4118	1.15172	TRUE	FALSE	FALSE	TRUE
4962	Mn0.35Al0.1Fe0.5Si0.05	NaN	28.4316	0.93915	TRUE	FALSE	TRUE	TRUE
5558	Ti0.2Cr0.05Fe0.65Si0.1	NaN	28.4375	1.31221	FALSE	FALSE	TRUE	TRUE
2105	Mn0.5Zn0.05Fe0.4Si0.05	NaN	28.4518	1.24335	TRUE	FALSE	FALSE	TRUE
1490	Mn0.3Zn0.15Fe0.5Si0.05	NaN	28.454	1.22883	TRUE	FALSE	FALSE	TRUE
3116	Mg0.1Mn0.5Fe0.3Si0.1	NaN	28.4614	1.35181	TRUE	FALSE	FALSE	TRUE
1616	Mg0.15Ti0.05Mn0.3Fe0.5	NaN	28.4619	1.07327	TRUE	FALSE	FALSE	TRUE
2704	Mg0.15Ti0.05Mn0.45Fe0.35	NaN	28.4654	1.37076	TRUE	FALSE	FALSE	TRUE
5697	Mn0.35Zn0.1Cr0.05Fe0.5	NaN	28.4744	1.45369	TRUE	FALSE	TRUE	TRUE
5810	Mg0.15Mn0.35Al0.05Fe0.45	NaN	28.4755	1.07312	TRUE	FALSE	FALSE	TRUE
2474	Ti0.05Mn0.45Fe0.35Si0.15	NaN	28.4861	1.30868	TRUE	FALSE	FALSE	TRUE
1427	Ti0.05Mn0.4Zn0.05Fe0.5	NaN	28.488	1.15372	TRUE	FALSE	FALSE	TRUE
5879	Mg0.1Mn0.45Cr0.05Fe0.4	NaN	28.4982	1.49885	TRUE	FALSE	TRUE	TRUE
446	Mn0.5Fe0.35Si0.15	NaN	28.5071	1.224	TRUE	FALSE	FALSE	TRUE
2761	Mg0.05Mn0.5Fe0.35Si0.1	NaN	28.5178	1.24408	TRUE	FALSE	TRUE	TRUE
2080	Mg0.05Ti0.2Mn0.3Fe0.45	NaN	28.5237	1.40939	TRUE	FALSE	FALSE	TRUE
5881	Mg0.05Mn0.5Cr0.05Fe0.4	NaN	28.5258	1.48538	TRUE	FALSE	FALSE	TRUE
2437	Ti0.05Mn0.55Fe0.35Si0.05	NaN	28.5263	1.33146	FALSE	TRUE	FALSE	TRUE
1652	Ti0.2Mn0.15Fe0.5Si0.15	NaN	28.5264	1.26899	TRUE	FALSE	FALSE	TRUE
4901	Ti0.25Mn0.05Al0.1Fe0.6	NaN	28.5698	1.17834	FALSE	FALSE	TRUE	TRUE
2403	Mg0.05Mn0.5Fe0.4Si0.05	NaN	28.5711	1.16206	TRUE	FALSE	FALSE	TRUE
2064	Mg0.05Mn0.45Fe0.45Si0.05	NaN	28.5745	1.06691	TRUE	FALSE	FALSE	TRUE
4578	Mg0.05Mn0.5Al0.15Fe0.3	NaN	28.5856	1.34276	TRUE	FALSE	FALSE	TRUE
2702	Mg0.15Mn0.45Fe0.35Si0.05	NaN	28.5893	1.27167	TRUE	FALSE	FALSE	TRUE
4965	Ti0.05Mn0.35Al0.1Fe0.5	NaN	28.6106	1.04086	TRUE	FALSE	TRUE	TRUE
1548	Ti0.05Mn0.25Zn0.2Fe0.5	NaN	28.619	1.39735	TRUE	FALSE	FALSE	TRUE
5126	Mn0.4Al0.1Zn0.1Fe0.4	NaN	28.623	1.32335	TRUE	FALSE	FALSE	TRUE
5685	Ti0.05Mn0.4Al0.05Fe0.5	NaN	28.633	1.05552	TRUE	FALSE	FALSE	TRUE
1981	Mg0.15Mn0.35Fe0.45Si0.05	NaN	28.6401	1.06938	TRUE	FALSE	FALSE	TRUE
4270	Ti0.05Mn0.3Al0.15Fe0.5	NaN	28.6413	1.0254	TRUE	FALSE	FALSE	TRUE
1687	Mg0.1Mn0.3Fe0.5Si0.1	NaN	28.6452	0.948834	TRUE	FALSE	FALSE	TRUE
3087	Mg0.15Mn0.5Fe0.3Si0.05	NaN	28.6767	1.3731	TRUE	FALSE	FALSE	TRUE
5691	Mn0.35Al0.05Fe0.5Si0.1	NaN	28.6836	0.935687	TRUE	FALSE	TRUE	TRUE
1682	Mg0.1Mn0.35Zn0.05Fe0.5	NaN	28.6863	1.08	TRUE	FALSE	TRUE	TRUE
4768	Mn0.05Zn0.1Cr0.1Fe0.75	NaN	28.6975	1.30367	FALSE	FALSE	TRUE	TRUE
5696	Mn0.35Al0.05Zn0.1Fe0.5	NaN	28.7005	1.14877	TRUE	FALSE	TRUE	TRUE
5905	Mn0.45Al0.05Fe0.35Si0.15	NaN	28.7117	1.21336	TRUE	FALSE	FALSE	TRUE
5051	Ti0.05Mn0.4Al0.1Fe0.45	NaN	28.7159	1.1364	TRUE	FALSE	TRUE	TRUE
2409	Mg0.05Mn0.45Fe0.4Si0.1	NaN	28.7197	1.14627	TRUE	FALSE	TRUE	TRUE
1459	Ti0.05Mn0.3Fe0.5Si0.15	NaN	28.721	1.01467	TRUE	FALSE	FALSE	TRUE
5886	Ti0.05Mn0.55Al0.05Fe0.35	NaN	28.7302	1.33518	FALSE	TRUE	FALSE	TRUE
2116	Mn0.45Zn0.05Fe0.4Si0.1	NaN	28.7324	1.23022	TRUE	FALSE	TRUE	TRUE
5439	Ti0.15Al0.1Cr0.05Fe0.7	NaN	28.7393	1.13881	FALSE	FALSE	TRUE	TRUE
1744	Mg0.05Ti0.15Mn0.3Fe0.5	NaN	28.7486	1.23178	TRUE	FALSE	FALSE	TRUE
2757	Mg0.05Mn0.55Zn0.05Fe0.35	NaN	28.7545	1.35441	FALSE	TRUE	FALSE	TRUE
986	Ti0.2Mn0.05Fe0.65Si0.1	NaN	28.7563	0.990362	FALSE	FALSE	TRUE	TRUE
5504	Zn0.1Cr0.05Fe0.7Si0.15	NaN	28.7626	1.04812	FALSE	FALSE	TRUE	TRUE
5773	Mn0.4Al0.05Fe0.45Si0.1	NaN	28.7745	1.03288	TRUE	FALSE	TRUE	TRUE
5708	Mn0.3Al0.05Zn0.15Fe0.5	NaN	28.786	1.23232	TRUE	FALSE	FALSE	TRUE
1180	Mg0.05Ti0.25Mn0.1Fe0.6	NaN	28.7911	1.20554	FALSE	FALSE	TRUE	TRUE
1816	Mn0.35Zn0.05Fe0.45Si0.15	NaN	28.7925	1.12006	TRUE	FALSE	FALSE	TRUE
2181	Mn0.35Zn0.1Fe0.4Si0.15	NaN	28.7928	1.30447	TRUE	FALSE	FALSE	TRUE
1814	Ti0.05Mn0.35Fe0.45Si0.15	NaN	28.7966	1.1125	TRUE	FALSE	FALSE	TRUE
2521	Mn0.4Zn0.1Fe0.35Si0.15	NaN	28.8265	1.4001	TRUE	FALSE	FALSE	TRUE
5466	Mn0.05Zn0.1Cr0.05Fe0.8	NaN	28.8298	0.922667	FALSE	FALSE	TRUE	TRUE
1513	Mn0.25Zn0.1Fe0.5Si0.15	NaN	28.8299	1.11369	TRUE	FALSE	FALSE	TRUE
5242	Mn0.5Al0.1Fe0.3Si0.1	NaN	28.8337	1.31768	TRUE	FALSE	FALSE	TRUE
1584	Ti0.15Mn0.2Zn0.15Fe0.5	NaN	28.8338	1.47298	TRUE	FALSE	FALSE	TRUE
648	Mn0.35Al0.15Fe0.5	NaN	28.8495	0.942621	TRUE	FALSE	FALSE	TRUE
2709	Mg0.15Ti0.1Mn0.4Fe0.35	NaN	28.8551	1.45804	TRUE	FALSE	FALSE	TRUE
1679	Mg0.1Mn0.35Fe0.5Si0.05	NaN	28.8551	0.97027	TRUE	FALSE	TRUE	TRUE
2382	Mg0.1Mn0.4Zn0.1Fe0.4	NaN	28.857	1.35506	TRUE	FALSE	FALSE	TRUE
5117	Mn0.45Al0.1Zn0.05Fe0.4	NaN	28.8611	1.23753	TRUE	FALSE	TRUE	TRUE
1532	Mn0.25Zn0.15Fe0.5Si0.1	NaN	28.8654	1.21562	TRUE	FALSE	FALSE	TRUE
1478	Ti0.1Mn0.3Zn0.1Fe0.5	NaN	28.8687	1.31383	TRUE	FALSE	FALSE	TRUE
4535	Mn0.5Al0.15Fe0.3Si0.05	NaN	28.888	1.32168	TRUE	FALSE	FALSE	TRUE
6106	Mn0.4Al0.05Cr0.05Fe0.5	NaN	28.89	1.28331	TRUE	FALSE	FALSE	TRUE
5509	Mg0.1Ti0.15Cr0.05Fe0.7	NaN	28.8931	1.17078	FALSE	FALSE	TRUE	TRUE
2440	Ti0.05Mn0.55Zn0.05Fe0.35	NaN	28.8949	1.42394	FALSE	TRUE	FALSE	TRUE
2078	Mg0.05Ti0.15Mn0.35Fe0.45	NaN	28.9043	1.32648	TRUE	FALSE	FALSE	TRUE
317	Mg0.15Mn0.35Fe0.5	NaN	28.9082	0.989502	TRUE	FALSE	FALSE	TRUE
5282	Mg0.05Mn0.55Al0.1Fe0.3	NaN	28.9193	1.34992	FALSE	FALSE	TRUE	TRUE
4540	Mn0.5Al0.15Zn0.05Fe0.3	NaN	28.9288	1.42149	TRUE	FALSE	FALSE	TRUE
6082	Ti0.15Al0.05Cr0.1Fe0.7	NaN	28.9413	1.46399	FALSE	FALSE	TRUE	TRUE
5033	Ti0.3Mn0.1Al0.1Fe0.5	NaN	28.9479	1.46123	TRUE	FALSE	FALSE	TRUE
5957	Mn0.5Al0.05Fe0.3Si0.15	NaN	28.9507	1.31369	TRUE	FALSE	FALSE	TRUE
4349	Ti0.05Mn0.35Al0.15Fe0.45	NaN	28.953	1.12356	TRUE	FALSE	FALSE	TRUE
5818	Mg0.1Mn0.4Al0.05Fe0.45	NaN	28.9747	1.07174	TRUE	FALSE	TRUE	TRUE
4972	Na0.1Mn0.3Al0.1Fe0.5	NaN	28.9783	0.913595	TRUE	FALSE	FALSE	TRUE
1742	Mg0.05Mn0.3Fe0.5Si0.15	NaN	28.9908	0.929311	TRUE	FALSE	FALSE	TRUE
1737	Mg0.05Ti0.1Mn0.35Fe0.5	NaN	28.9911	1.15067	TRUE	FALSE	TRUE	TRUE
1804	Ti0.05Mn0.4Zn0.1Fe0.45	NaN	29.0026	1.3256	TRUE	FALSE	TRUE	TRUE
1599	Ti0.1Mn0.2Zn0.2Fe0.5	NaN	29.003	1.47432	TRUE	FALSE	FALSE	TRUE
1450	Ti0.05Mn0.35Zn0.1Fe0.5	NaN	29.0066	1.23644	TRUE	FALSE	TRUE	TRUE
1162	Ti0.25Mn0.05Zn0.1Fe0.6	NaN	29.0122	1.36901	FALSE	FALSE	TRUE	TRUE
2028	Mg0.1Mn0.4Zn0.05Fe0.45	NaN	29.0363	1.17448	TRUE	FALSE	TRUE	TRUE
5553	Mg0.1Ti0.2Cr0.05Fe0.65	NaN	29.0387	1.35314	FALSE	FALSE	TRUE	TRUE
5688	Mn0.4Zn0.05Cr0.05Fe0.5	NaN	29.0509	1.3733	TRUE	FALSE	FALSE	TRUE
5039	Mg0.05Mn0.35Al0.1Fe0.5	NaN	29.0815	0.958166	TRUE	FALSE	TRUE	TRUE
5577	Mg0.25Mn0.1Cr0.05Fe0.6	NaN	29.0901	1.12415	FALSE	FALSE	TRUE	TRUE
1449	Mn0.35Zn0.1Fe0.5Si0.05	NaN	29.1018	1.14533	TRUE	FALSE	TRUE	TRUE
5447	Mn0.4Al0.1Cr0.05Fe0.45	NaN	29.1034	1.37015	TRUE	FALSE	TRUE	TRUE
5481	Mn0.1Zn0.1Cr0.05Fe0.75	NaN	29.1114	1.01082	FALSE	FALSE	TRUE	TRUE
5932	Mg0.15Mn0.45Al0.05Fe0.35	NaN	29.1133	1.27565	TRUE	FALSE	FALSE	TRUE
2195	Mn0.35Zn0.15Fe0.4Si0.1	NaN	29.1172	1.4	TRUE	FALSE	FALSE	TRUE
3112	Mg0.1Mn0.55Zn0.05Fe0.3	NaN	29.1244	1.45889	FALSE	FALSE	TRUE	TRUE
1735	Mg0.05Mn0.35Fe0.5Si0.1	NaN	29.1275	0.95118	TRUE	FALSE	TRUE	TRUE
1385	Ti0.3Mn0.1Fe0.55Si0.05	NaN	29.1334	1.36476	FALSE	FALSE	TRUE	TRUE
1723	Ti0.3Mn0.1Fe0.5Si0.1	NaN	29.1477	1.45307	TRUE	FALSE	FALSE	TRUE
5231	Mn0.55Al0.1Fe0.3Si0.05	NaN	29.1483	1.32938	FALSE	FALSE	TRUE	TRUE
4525	Mg0.05Mn0.45Al0.15Fe0.35	NaN	29.1619	1.2418	TRUE	FALSE	FALSE	TRUE
4283	Ti0.1Mn0.25Al0.15Fe0.5	NaN	29.167	1.10934	TRUE	FALSE	FALSE	TRUE
4273	Mn0.3Al0.15Zn0.05Fe0.5	NaN	29.1716	1.03445	TRUE	FALSE	FALSE	TRUE
1437	Mn0.35Zn0.05Fe0.5Si0.1	NaN	29.1818	1.04251	TRUE	FALSE	TRUE	TRUE
5682	Mn0.4Al0.05Fe0.5Si0.05	NaN	29.194	0.95678	TRUE	FALSE	FALSE	TRUE
5121	Mn0.4Al0.1Fe0.4Si0.1	NaN	29.2036	1.11697	TRUE	FALSE	FALSE	TRUE
5617	Ti0.25Cr0.05Fe0.6Si0.1	NaN	29.2068	1.49576	FALSE	FALSE	TRUE	TRUE
2073	Mg0.05Mn0.4Zn0.1Fe0.45	NaN	29.218	1.25474	TRUE	FALSE	TRUE	TRUE
613	Mn0.5Al0.2Fe0.3	NaN	29.2181	1.32568	TRUE	FALSE	FALSE	TRUE
1424	Ti0.05Mn0.4Fe0.5Si0.05	NaN	29.2217	1.05209	TRUE	FALSE	FALSE	TRUE
977	Ti0.2Zn0.1Fe0.65Si0.05	NaN	29.2299	1.18522	FALSE	FALSE	TRUE	TRUE
1623	Mg0.15Mn0.25Fe0.5Si0.1	NaN	29.2346	0.946338	TRUE	FALSE	FALSE	TRUE
4470	Mn0.45Al0.15Fe0.35Si0.05	NaN	29.2414	1.22112	TRUE	FALSE	FALSE	TRUE
4995	Mn0.25Al0.1Zn0.15Fe0.5	NaN	29.2587	1.22274	TRUE	FALSE	FALSE	TRUE
1604	Na0.05Ti0.25Mn0.2Fe0.5	NaN	29.2631	1.37771	TRUE	FALSE	FALSE	TRUE
5723	Mn0.25Al0.05Zn0.2Fe0.5	NaN	29.2633	1.31431	TRUE	FALSE	FALSE	TRUE
3140	Mg0.05Mn0.5Fe0.3Si0.15	NaN	29.2653	1.33068	TRUE	FALSE	FALSE	TRUE
2343	Mg0.15Ti0.1Mn0.35Fe0.4	NaN	29.2835	1.35792	TRUE	FALSE	FALSE	TRUE
5714	Mn0.25Cr0.05Fe0.5Si0.2	NaN	29.2994	1.24063	TRUE	FALSE	FALSE	TRUE
1714	Mg0.1Ti0.25Mn0.15Fe0.5	NaN	29.3067	1.40851	TRUE	FALSE	FALSE	TRUE
4475	Mn0.45Al0.15Zn0.05Fe0.35	NaN	29.3082	1.32447	TRUE	FALSE	FALSE	TRUE
983	Mg0.05Ti0.2Mn0.1Fe0.65	NaN	29.3122	1.02874	FALSE	FALSE	TRUE	TRUE
1983	Mg0.15Ti0.05Mn0.35Fe0.45	NaN	29.3324	1.17225	TRUE	FALSE	FALSE	TRUE
4778	Zn0.05Cr0.1Fe0.7Si0.15	NaN	29.3395	1.27641	FALSE	FALSE	TRUE	TRUE
1113	Mg0.1Mn0.25Fe0.6Si0.05	NaN	29.3647	0.775115	FALSE	FALSE	TRUE	TRUE
2076	Mg0.05Mn0.35Fe0.45Si0.15	NaN	29.3697	1.02938	TRUE	FALSE	FALSE	TRUE
1695	Mg0.1Mn0.25Fe0.5Si0.15	NaN	29.3773	0.926205	TRUE	FALSE	FALSE	TRUE
1738	Mg0.05Mn0.35Zn0.1Fe0.5	NaN	29.3793	1.16373	TRUE	FALSE	TRUE	TRUE
4338	Mg0.05Mn0.3Al0.15Fe0.5	NaN	29.3943	0.940011	TRUE	FALSE	FALSE	TRUE
5048	Mn0.4Al0.1Fe0.45Si0.05	NaN	29.3958	1.03645	TRUE	FALSE	TRUE	TRUE
1984	Mg0.15Mn0.35Zn0.05Fe0.45	NaN	29.4	1.17888	TRUE	FALSE	FALSE	TRUE
5819	Mg0.1Mn0.4Cr0.05Fe0.45	NaN	29.4021	1.4028	TRUE	FALSE	TRUE	TRUE
1540	Na0.05Ti0.2Mn0.25Fe0.5	NaN	29.4041	1.29442	TRUE	FALSE	FALSE	TRUE
5505	Ti0.15Zn0.1Cr0.05Fe0.7	NaN	29.4133	1.32998	FALSE	FALSE	TRUE	TRUE
5760	Mg0.05Mn0.4Cr0.05Fe0.5	NaN	29.4255	1.29893	TRUE	FALSE	FALSE	TRUE
323	Mg0.1Mn0.4Fe0.5	NaN	29.4265	0.990606	TRUE	FALSE	FALSE	TRUE
4805	Ti0.15Cr0.1Fe0.7Si0.05	NaN	29.4285	1.46008	FALSE	FALSE	TRUE	TRUE
873	Ti0.15Zn0.1Fe0.7Si0.05	NaN	29.4285	1.0139	FALSE	FALSE	TRUE	TRUE
3109	Mg0.1Mn0.55Fe0.3Si0.05	NaN	29.4301	1.36267	FALSE	FALSE	TRUE	TRUE
5986	Mg0.1Mn0.55Al0.05Fe0.3	NaN	29.4561	1.36663	FALSE	FALSE	TRUE	TRUE
1533	Ti0.1Mn0.25Zn0.15Fe0.5	NaN	29.4564	1.39482	TRUE	FALSE	FALSE	TRUE
5235	Mn0.55Al0.1Zn0.05Fe0.3	NaN	29.4608	1.42628	FALSE	FALSE	TRUE	TRUE
5984	Mg0.15Mn0.5Al0.05Fe0.3	NaN	29.4627	1.37719	TRUE	FALSE	FALSE	TRUE
2502	Mn0.45Zn0.15Fe0.35Si0.05	NaN	29.4822	1.49896	TRUE	FALSE	FALSE	TRUE
1842	Ti0.05Mn0.35Zn0.15Fe0.45	NaN	29.4866	1.40604	TRUE	FALSE	FALSE	TRUE
5015	Mg0.15Mn0.25Al0.1Fe0.5	NaN	29.4965	0.953758	TRUE	FALSE	FALSE	TRUE
2025	Mg0.1Mn0.4Fe0.45Si0.05	NaN	29.4989	1.06811	TRUE	FALSE	TRUE	TRUE
4979	Mn0.3Al0.1Zn0.1Fe0.5	NaN	29.4995	1.13692	TRUE	FALSE	FALSE	TRUE
5683	Mn0.4Cr0.05Fe0.5Si0.05	NaN	29.5007	1.27966	TRUE	FALSE	FALSE	TRUE
5711	Mg0.25Mn0.2Cr0.05Fe0.5	NaN	29.5111	1.33391	TRUE	FALSE	FALSE	TRUE
5802	Mg0.2Mn0.3Cr0.05Fe0.45	NaN	29.5188	1.42624	TRUE	FALSE	FALSE	TRUE
1410	Mg0.05Ti0.3Mn0.1Fe0.55	NaN	29.5224	1.38506	FALSE	FALSE	TRUE	TRUE
975	Ti0.2Mn0.05Zn0.1Fe0.65	NaN	29.525	1.19928	FALSE	FALSE	TRUE	TRUE
5736	Mn0.2Al0.05Zn0.25Fe0.5	NaN	29.5252	1.39479	TRUE	FALSE	FALSE	TRUE
1928	Na0.05Ti0.25Mn0.25Fe0.45	NaN	29.5322	1.47394	TRUE	FALSE	FALSE	TRUE
5778	Mn0.4Al0.05Zn0.1Fe0.45	NaN	29.5389	1.23954	TRUE	FALSE	TRUE	TRUE
2476	Mn0.45Zn0.05Fe0.35Si0.15	NaN	29.5418	1.31294	TRUE	FALSE	FALSE	TRUE
1886	Ti0.05Mn0.3Zn0.2Fe0.45	NaN	29.5434	1.48501	TRUE	FALSE	FALSE	TRUE
1671	Na0.05Ti0.3Mn0.15Fe0.5	NaN	29.5462	1.46214	TRUE	FALSE	FALSE	TRUE
1731	Mg0.05Ti0.05Mn0.4Fe0.5	NaN	29.5483	1.07063	TRUE	FALSE	FALSE	TRUE
2027	Mg0.1Ti0.05Mn0.4Fe0.45	NaN	29.555	1.16798	TRUE	FALSE	TRUE	TRUE
1617	Mg0.15Mn0.3Zn0.05Fe0.5	NaN	29.5613	1.08158	TRUE	FALSE	FALSE	TRUE
1746	Mg0.05Mn0.3Zn0.15Fe0.5	NaN	29.5669	1.24734	TRUE	FALSE	FALSE	TRUE
5943	Mn0.55Al0.05Fe0.3Si0.1	NaN	29.5816	1.32549	FALSE	FALSE	TRUE	TRUE
5503	Mn0.15Zn0.1Cr0.05Fe0.7	NaN	29.5914	1.09911	FALSE	FALSE	TRUE	TRUE
1732	Mg0.05Mn0.4Zn0.05Fe0.5	NaN	29.5992	1.07851	TRUE	FALSE	FALSE	TRUE
1415	Ti0.35Mn0.05Fe0.55Si0.05	NaN	29.6028	1.44918	FALSE	TRUE	FALSE	TRUE
3750	Mg0.05Mn0.25Al0.2Fe0.5	NaN	29.6184	0.920805	TRUE	FALSE	FALSE	TRUE
1184	Ti0.25Mn0.05Fe0.6Si0.1	NaN	29.6186	1.17086	FALSE	FALSE	TRUE	TRUE
1592	Na0.1Ti0.2Mn0.2Fe0.5	NaN	29.6282	1.28227	TRUE	FALSE	FALSE	TRUE
1936	Mg0.2Ti0.05Mn0.3Fe0.45	NaN	29.6506	1.1768	TRUE	FALSE	FALSE	TRUE
1468	Na0.1Mn0.3Fe0.5Si0.1	NaN	29.6602	0.906474	TRUE	FALSE	FALSE	TRUE
4081	Mn0.25Al0.2Cr0.05Fe0.5	NaN	29.6618	1.25629	TRUE	FALSE	FALSE	TRUE
2072	Mg0.05Ti0.1Mn0.4Fe0.45	NaN	29.664	1.24467	TRUE	FALSE	TRUE	TRUE
956	Mg0.1Ti0.2Mn0.05Fe0.65	NaN	29.6644	1.02878	FALSE	FALSE	TRUE	TRUE
1547	Mn0.25Zn0.2Fe0.5Si0.05	NaN	29.6781	1.31077	TRUE	FALSE	FALSE	TRUE
974	Mg0.05Ti0.2Zn0.1Fe0.65	NaN	29.6894	1.2042	FALSE	FALSE	TRUE	TRUE
2539	Mn0.4Zn0.15Fe0.35Si0.1	NaN	29.6923	1.49242	TRUE	FALSE	FALSE	TRUE
4774	Mg0.15Ti0.05Cr0.1Fe0.7	NaN	29.6939	1.33315	FALSE	FALSE	TRUE	TRUE
4847	Mg0.25Mn0.05Cr0.1Fe0.6	NaN	29.7009	1.47182	FALSE	FALSE	TRUE	TRUE
936	Ti0.2Mn0.1Zn0.05Fe0.65	NaN	29.7017	1.1148	FALSE	FALSE	TRUE	TRUE
2194	Na0.1Mn0.35Zn0.15Fe0.4	NaN	29.721	1.40146	TRUE	FALSE	FALSE	TRUE
748	Mn0.5Al0.05Fe0.45	NaN	29.7286	1.06921	TRUE	FALSE	FALSE	TRUE
5582	Mn0.25Zn0.1Cr0.05Fe0.6	NaN	29.7305	1.27611	FALSE	FALSE	TRUE	TRUE
3919	Ti0.05Mn0.45Al0.2Fe0.3	NaN	29.7321	1.41387	TRUE	FALSE	FALSE	TRUE
1803	Mn0.4Zn0.1Fe0.45Si0.05	NaN	29.7332	1.23601	TRUE	FALSE	TRUE	TRUE
4797	Ti0.15Mn0.05Al0.1Fe0.7	NaN	29.7337	0.819246	FALSE	FALSE	TRUE	TRUE
826	Mg0.15Mn0.1Fe0.7Si0.05	NaN	29.7357	0.566872	FALSE	FALSE	TRUE	TRUE
4967	Mn0.35Al0.1Zn0.05Fe0.5	NaN	29.739	1.04942	TRUE	FALSE	TRUE	TRUE
5787	Mn0.35Al0.05Zn0.15Fe0.45	NaN	29.7396	1.32231	TRUE	FALSE	FALSE	TRUE
5611	Mg0.1Mn0.25Cr0.05Fe0.6	NaN	29.7397	1.11563	FALSE	FALSE	TRUE	TRUE
1211	Ti0.1Mn0.3Zn0.05Fe0.55	NaN	29.7549	1.14089	FALSE	FALSE	TRUE	TRUE
4761	Ti0.1Zn0.05Cr0.1Fe0.75	NaN	29.7552	1.37825	FALSE	FALSE	TRUE	TRUE
327	Mn0.5Fe0.45Si0.05	NaN	29.7585	1.06579	TRUE	FALSE	FALSE	TRUE
5790	Mn0.3Cr0.05Fe0.45Si0.2	NaN	29.759	1.3409	TRUE	FALSE	FALSE	TRUE
1524	Na0.1Ti0.15Mn0.25Fe0.5	NaN	29.76	1.19762	TRUE	FALSE	FALSE	TRUE
5332	Mg0.05Mn0.6Al0.1Fe0.25	NaN	29.7683	1.44829	FALSE	FALSE	TRUE	TRUE
2341	Mg0.15Mn0.35Fe0.4Si0.1	NaN	29.7803	1.15387	TRUE	FALSE	FALSE	TRUE
5540	Ti0.2Al0.05Zn0.1Fe0.65	NaN	29.7836	1.18878	FALSE	FALSE	TRUE	TRUE
1426	Mn0.4Zn0.05Fe0.5Si0.05	NaN	29.787	1.06024	TRUE	FALSE	FALSE	TRUE
2439	Mn0.55Zn0.05Fe0.35Si0.05	NaN	29.7882	1.33513	FALSE	TRUE	FALSE	TRUE
2070	Mg0.05Mn0.4Fe0.45Si0.1	NaN	29.7906	1.04864	TRUE	FALSE	TRUE	TRUE
4771	Ti0.05Zn0.1Cr0.1Fe0.75	NaN	29.7911	1.38109	FALSE	FALSE	TRUE	TRUE
4807	Mg0.2Mn0.05Cr0.1Fe0.65	NaN	29.8053	1.356	FALSE	FALSE	TRUE	TRUE
5516	Ti0.15Cr0.05Fe0.7Si0.1	NaN	29.8106	1.13151	FALSE	FALSE	TRUE	TRUE
4770	Zn0.1Cr0.1Fe0.75Si0.05	NaN	29.8159	1.29247	FALSE	FALSE	TRUE	TRUE
5936	Mg0.05Mn0.55Al0.05Fe0.35	NaN	29.8189	1.26111	FALSE	TRUE	FALSE	TRUE
4326	Mg0.1Mn0.25Al0.15Fe0.5	NaN	29.8267	0.937236	TRUE	FALSE	FALSE	TRUE
857	Ti0.15Mn0.1Fe0.7Si0.05	NaN	29.8283	0.836639	FALSE	FALSE	TRUE	TRUE
5888	Mn0.55Al0.05Zn0.05Fe0.35	NaN	29.8304	1.3388	FALSE	TRUE	FALSE	TRUE
938	Ti0.2Zn0.05Fe0.65Si0.1	NaN	29.8357	1.08131	FALSE	FALSE	TRUE	TRUE
5108	Mg0.05Mn0.4Al0.1Fe0.45	NaN	29.836	1.05584	TRUE	FALSE	TRUE	TRUE
4351	Mn0.35Al0.15Zn0.05Fe0.45	NaN	29.8364	1.13096	TRUE	FALSE	FALSE	TRUE
5759	Mg0.05Mn0.4Al0.05Fe0.5	NaN	29.8491	0.975353	TRUE	FALSE	FALSE	TRUE
3111	Mg0.1Ti0.05Mn0.55Fe0.3	NaN	29.8606	1.45717	FALSE	FALSE	TRUE	TRUE
4394	Mg0.05Mn0.35Al0.15Fe0.45	NaN	29.8621	1.04042	TRUE	FALSE	FALSE	TRUE
5884	Mn0.55Al0.05Fe0.35Si0.05	NaN	29.867	1.24146	FALSE	TRUE	FALSE	TRUE
4480	Mn0.4Al0.15Fe0.35Si0.1	NaN	29.8679	1.20608	TRUE	FALSE	FALSE	TRUE
1730	Mg0.05Mn0.4Fe0.5Si0.05	NaN	29.8717	0.971931	TRUE	FALSE	FALSE	TRUE
1681	Mg0.1Ti0.05Mn0.35Fe0.5	NaN	29.8866	1.07191	TRUE	FALSE	TRUE	TRUE
5782	Mn0.35Al0.05Fe0.45Si0.15	NaN	29.8873	1.01324	TRUE	FALSE	FALSE	TRUE
3090	Mg0.15Mn0.5Zn0.05Fe0.3	NaN	29.8909	1.47181	TRUE	FALSE	FALSE	TRUE
1609	Na0.05Mn0.2Zn0.25Fe0.5	NaN	29.9013	1.39186	TRUE	FALSE	FALSE	TRUE
700	Mn0.4Al0.1Fe0.5	NaN	29.9044	0.960177	TRUE	FALSE	FALSE	TRUE
1476	Na0.1Mn0.3Zn0.1Fe0.5	NaN	29.9084	1.12879	TRUE	FALSE	FALSE	TRUE
4315	Ti0.2Mn0.15Al0.15Fe0.5	NaN	29.9121	1.28079	TRUE	FALSE	FALSE	TRUE
1026	Ti0.1Mn0.25Fe0.6Si0.05	NaN	29.9244	0.944893	FALSE	FALSE	TRUE	TRUE
375	Mg0.05Mn0.5Fe0.45	NaN	29.9249	1.08428	TRUE	FALSE	FALSE	TRUE
1629	Mg0.15Mn0.25Zn0.1Fe0.5	NaN	29.9267	1.17179	TRUE	FALSE	FALSE	TRUE
5510	Ti0.15Mn0.1Al0.05Fe0.7	NaN	29.9438	0.839878	FALSE	FALSE	TRUE	TRUE
307	Mn0.25Zn0.25Fe0.5	NaN	29.9502	1.39981	TRUE	FALSE	FALSE	TRUE
4810	Mg0.2Ti0.05Cr0.1Fe0.65	NaN	29.9535	1.44533	FALSE	FALSE	TRUE	TRUE
5687	Mn0.4Al0.05Zn0.05Fe0.5	NaN	29.9593	1.06362	TRUE	FALSE	FALSE	TRUE
4849	Mn0.25Al0.1Fe0.6Si0.05	NaN	29.9638	0.745067	FALSE	FALSE	TRUE	TRUE
5011	Mn0.2Al0.1Zn0.2Fe0.5	NaN	29.9655	1.30692	TRUE	FALSE	FALSE	TRUE
5701	Mn0.3Al0.05Fe0.5Si0.15	NaN	29.9714	0.913459	TRUE	FALSE	FALSE	TRUE
5027	Mn0.15Al0.1Zn0.25Fe0.5	NaN	29.9792	1.38951	TRUE	FALSE	FALSE	TRUE
852	Mg0.1Ti0.15Mn0.05Fe0.7	NaN	29.9797	0.849462	FALSE	FALSE	TRUE	TRUE
5667	Mg0.1Mn0.3Cr0.05Fe0.55	NaN	29.9818	1.21119	FALSE	FALSE	TRUE	TRUE
1554	Mg0.2Ti0.05Mn0.25Fe0.5	NaN	29.9941	1.07471	TRUE	FALSE	FALSE	TRUE
6026	Mg0.1Mn0.6Al0.05Fe0.25	NaN	29.9947	1.46528	FALSE	FALSE	TRUE	TRUE
1546	Na0.05Mn0.25Zn0.2Fe0.5	NaN	29.998	1.31107	TRUE	FALSE	FALSE	TRUE
