# Supplementary material for: A simple constrained machine learning model for predicting high-pressure-hydrogen-compressor materials
Source: Royal Society of Chemistry journal article supplement (doi:10.1039/c8me00005k), 2018-01-01
Supplement: c8me00005k3.xlsx [file c8me00005k3.xlsx]

## Sheet: HydrogenStorageDataBasemagpie
comp	H2_wtpercent	Enthalpy	Predicted Enthalpy (w/o 50 compounds)	Abs Error	Relative Error	MAE	Predicted Enthalpy (w/50 compounds)	Abs Error	relative error	MAE	Temp_C	P_atm	Phase	Entropy (J/molK)
TiCr1.5Mn0.2Fe0.3		18.32	30.13	11.81	64.4651	4.37444	19.74	1.42	0.0775109	1.1118	25	116.4	AB2	101
TiCr1.5Mn0.25Fe0.25		19.32	30.43	11.11	57.5052		19.85	0.53	0.0274327		25	83.61	AB2	101.6
TiCr1.7Ni0.3		21.7	32.53	10.83	49.9078	MRE	23.16	1.46	0.0672811	MRE	100	343.5	AB2	106.7
TiCr1.5Mn0.2Fe0.2		20.78	30.22	9.44	45.4283	19.3982	20.48	0.3	0.014437	0.0459128	164	1000	AB2	104.97
TiCr1.6Mn0.2Fe0.2		19.66	28.28	8.62	43.8454		20.16	0.5	0.0254323		162	1000	AB2	102.6
(Ti0.85Zr0.15)1.1Cr0.9W0.1Mn	1.36	22.6	32.23	9.63	42.6106		23.94	1.34	0.059292		80	167.5	AB2	106.2
TiCr1.58Mn0.2Fe0.2		19.9	28.31	8.41	42.2613		20.17	0.27	0.0135678		159	1000	AB2	103.48
TiCr1.75Ni0.1		20.5	28.87	8.37	40.8293		22.21	1.71	0.0834146		100	577.2	AB2	107.8
TiCr1.55Mn0.2Fe0.2		20.32	28.48	8.16	40.1575		20.23	0.09	0.00442913		157	1000	AB2	104.67
Ti0.9Zr0.15Mn1.6Cr0.2V0.2		15.37	21.14	5.77	37.5407		19.86	4.49	0.292128		120	26.4024	AB2	66.31
(Ti0.85Zr0.15)1.1Cr0.85Mo0.15Mn	1.67	21.7	29.36	7.66	35.2995		23.44	1.74	0.0801843		80	114.7	AB2	100.9
TiCr0.95Mn0.95		22.8	29.04	6.24	27.3684		23.35	0.55	0.0241228		100	646	AB2	114.9
TiCr1.78		28.4	21.01	7.39	26.0211		26.08	2.32	0.0816901		100	653.264	AB2	130
Ti1.1CrMn	1.6	22.9	28.85	5.95	25.9825		23.37	0.47	0.020524		100	610.7	AB2	114.7
TiCr1.75Al0.05	1.9	24	30.08	6.08	25.3333		26.34	2.34	0.0975		100	500.9	AB2	116
(Ti0.97Zr0.03)1.1Cr1.6Mn0.4		23.4	29.2	5.8	24.7863		24.38	0.98	0.0418803		99	527.9	AB2	115
(Ti0.85Zr0.15)1.1Cr0.95W0.05Mn	1.43	24.3	30.24	5.94	24.4444		24.58	0.28	0.0115226		80	128.3	AB2	109.2
(Ti0.85Zr0.15)1.1Cr0.9Mo0.1Mn	1.78	23.7	28.98	5.28	22.2785		23.88	0.18	0.00759494		80	103.3	AB2	106.4
TiCrMn0.8		22.4	25.88	3.48	15.5357		22.92	0.52	0.0232143		100	223.411	AB2	105
TiCr1.7Al0.2		28.1	32.33	4.23	15.0534		29.27	1.17	0.041637		100	600.8	AB2	128.5
Ti0.97Zr0.019V0.439Fe0.097Cr0.045Al0.026Mn1.5		25.4	28.7	3.3	12.9921		27.1	1.7	0.0669291		100	129.41	AB2	108.5
(Ti0.85Zr0.15)1.1Cr0.98W0.02Mn	1.52	26.3	29.7	3.4	12.9278		26.17	0.13	0.00494297		80	112.8	AB2	113.8
Ti0.9Zr0.15Mn1.6Cr0.2(VFe)0.2		29.98	26.12	3.86	12.8753		28.42	1.56	0.0520347		120	88.3132	AB2	113.51
TiCr1.6Mn0.2		28	24.82	3.18	11.3571		26.08	1.92	0.0685714		100	659	AB2	129
Ti0.98Zr0.02V0.41Fe0.08Cr0.05Mn1.46		29.2	25.97	3.23	11.0616		28.25	0.95	0.0325342		100	175.153	AB2	121.2
Ca0.95Zr0.05Ni4.9Cr0.1		31.6	35.09	3.49	11.0443		33.11	1.51	0.0477848		120	34.4337	AB5	109.8
TiCr1.9		26.19	23.34	2.85	10.882		25.28	0.91	0.0347461		30	72.34	AB2	122
Ti0.9Zr0.2Mn1.6Ni0.2(VFe)0.2		23.19	25.15	1.96	8.45192		26.11	2.92	0.125916		120	41.9995	AB2	90.06
(Ti0.85Zr0.15)1.1Cr0.95Mo0.05Mn		26.2	28.31	2.11	8.05344		25.71	0.49	0.0187023		100	223.9	AB2	115.2
TiCr1.9Mo0.01		24.8	26.74	1.94	7.82258		24.82	0.02	0.000806452		100	269.8	AB2	113
Ca0.95Zr0.05Ni5		33.5	35.81	2.31	6.89552		33.94	0.44	0.0131343		120	16.2707	AB5	108.4
Ti0.9Zr0.2Mn1.4Cr0.4V0.2		26.7	28.25	1.55	5.80524		26.83	0.13	0.00486891		120	30.0341	AB2	96.2
Ti0.9Zr0.2Mn1.8V0.2		26.01	27.5	1.49	5.72857		27.56	1.55	0.0595925		120	38.9212	AB2	96.6
Ti0.9Zr0.2Mn1.6Ni0.2V0.2		31.7	29.97	1.73	5.45741		31	0.7	0.022082		120	56.0163	AB2	114.1
CaNi4.9Cr0.1		37.2	39.23	2.03	5.45699		36.51	0.69	0.0185484		120	17.6762	AB5	118.5
TiCr1.2Mn0.6		24.4	25.6	1.2	4.91803		24.39	0.01	0.000409836		100	241.294	AB2	111
Ti0.9Zr0.2Mn1.4Cr0.4(VFe)0.2		25.49	26.55	1.06	4.15849		26.23	0.74	0.029031		120	41.2476	AB2	95.76
(Ti0.8Zr0.2)1.1CrMn		28.3	27.3	1	3.53357		27.69	0.61	0.0215548		100	75.6	AB2	111.8
Ti0.95Zr0.05V0.43Fe0.08Al0.01Mn1.48		29.4	30.35	0.95	3.23129		29.85	0.45	0.0153061		100	28.0248	AB2	106.5
Ti0.955Zr0.045V0.43Fe0.12Al0.03Mn1.52		28.7	29.55	0.85	2.96167		29.28	0.58	0.0202091		100	122.686	AB2	116.9
Ti0.9Zr0.2Mn1.8(VFe)0.2		29.15	28.34	0.81	2.77873		28.81	0.34	0.0116638		120	53.6818	AB2	107.26
Ti0.9Zr0.1Mn1.4Cr0.35V0.2Fe0.05		25.89	25.24	0.65	2.51062		26.24	0.35	0.0135187		100	91.14	AB2	106.9
TiCr1.4Mn0.4		28.3	28.87	0.57	2.01413		26.16	2.14	0.0756184		100	369.747	AB2	125
(Ti0.85Zr0.15)1.1CrMn	1.5	26.6	26.1	0.5	1.8797		26.97	0.37	0.0139098		100	135.5	AB2	112.1
V0.85Ti0.1Fe0.05	1.5	42.9	43.53	0.63	1.46853		43.18	0.28	0.00652681		100	53.14		148
TiCrMn		19.6	22.57				22.37	2.77	0.141327		25	126.8	AB2	106
TiFe	1.9	28.1	28.74				31.68	3.58	0.127402		100	40.1	AB	106
TiMn1.5	1.9	28	28.59				28.52	0.52	0.0185714		100	81.3	AB2	111.6
Ti0.98Zr0.02V0.43Fe0.09Cr0.05Mn1.5		27.4	25.8				26.85	0.55	0.020073		100	103.471	AB2	112
CaNi5		35.1	40.71				39.12	4.02	0.11453		120	15.0115	AB5	111.8
